# Supplementary material for: Dexamethasone for Inpatients With COVID-19 in a National Cohort
Source: PubMed Central journal article supplement (PMC10111178; doi:10.1001/jamanetworkopen.2023.8516), 2023-04-17

## Supplemental Online Content

Mourad A, Thibault D, Holland TL, et al. Dexamethasone for inpatients with COVID-19 in a national cohort. *JAMA Netw Open*. 2023;6(4):e238516.  
doi:10.1001/jamanetworkopen.2023.8516

**eFigure 1.** HCA Healthcare Geographic Representation

**eFigure 2.** HCA Starting Population Algorithm

**eAppendix 1.** Variables Identified as Confounders and Used for Adjustment

**eAppendix 2.** Study-Specific Inclusion and Exclusion Criteria

**eFigure 3.** Consort Diagram of Exclusions Applied to the Starting Population

**eFigure 4.** Cohort-Specific Selection Applied at the Time of Eligibility for Each

**eTable 1.** Characteristics of Patients Eligible for the No Supplemental Oxygen Cohort

**eTable 2.** Characteristics of Patients Eligible for the Supplemental Oxygen Cohort

**eTable 3.** Characteristics of Patients Eligible for the Noninvasive Positive Pressure Ventilation (NIPPV) Cohort

**eTable 4.** Characteristics of Patients Eligible for the Mechanical Ventilation (MV) or Extracorporeal Membrane Oxygenation (ECMO) Cohort

**eFigure 5.** Unadjusted Connect-S Plot for No Supplemental Oxygen Cohort

**eFigure 6.** IPW-Logistic Connect-S Plot for No Supplemental Oxygen Cohort

**eFigure 7.** OW Adjusted Connect-S Plot for No Supplemental Oxygen Cohort

**eFigure 8.** Unadjusted Connect-S Plot for Supplemental Oxygen Cohort

**eFigure 9.** IPW-Logistic Connect-S Plot for Supplemental Oxygen Cohort

**eFigure 10.** OW Adjusted Connect-S Plot for Supplemental Oxygen Cohort

**eFigure 11.** Unadjusted Connect-S Plot for NIPPV Cohort

**eFigure 12.** IPW-Logistic Connect-S Plot for NIPPV Cohort

**eFigure 13.** OW Adjusted Connect-S Plot for NIPPV Cohort

**eFigure 14.** Unadjusted Connect-S Plot for MV or ECMO Cohort

**eFigure 15.** IPW-Logistic Connect-S Plot for MV or ECMO Cohort

**eFigure 16.** OW Adjusted Connect-S Plot for MV or ECMO Cohort

**eFigure 17.** Histogram of the Propensity Score Distribution Overlaid by Treatment After Overlap Weighting for No Supplemental Oxygen Cohort

**eFigure 18.** Histogram of the Propensity Score Distribution Overlaid by Treatment After Overlap Weighting for Supplemental Oxygen Cohort

**eFigure 19.** Histogram of the Propensity Score Distribution Overlaid by Treatment After Overlap Weighting for NIPPV Cohort

**eFigure 20.** Histogram of the Propensity Score Distribution Overlaid by Treatment After Overlap Weighting for MV or ECMO Cohort

**eAppendix 3.** Handling of Missing Data and Multiple Imputation

**eTable 5.** Adjusted Odds Ratios of Single Imputed Data Set and Multiply Imputed Data Set

**eTable 6.** Frequency of End Points per Cohort

**eTable 7.** Unadjusted Analysis of In-Hospital Mortality or Discharge to Hospice

**eFigure 21.** Time Epoch Sensitivity Analysis for Patients on No Supplemental Oxygen

**eFigure 22.** Time Epoch Sensitivity Analysis for Patients on Supplemental Oxygen

**eFigure 23.** Time Epoch Sensitivity Analysis for Patients on NIPPV

**eFigure 24.** Time Epoch Sensitivity Analysis for Patients on MV/ECMO

This supplemental material has been provided by the authors to give readers additional information about their work.

## eFigure 1. HCA Healthcare Geographic Representation

### Data Setting

HCA Healthcare is a large healthcare system with over 180 affiliated acute care facilities among its more than 2000 associated sites of care in 21 United States and the United Kingdom, as denoted on the map to the right. The majority of these facilities are medium to large community hospitals. Only data from facilities in the United States were collected.

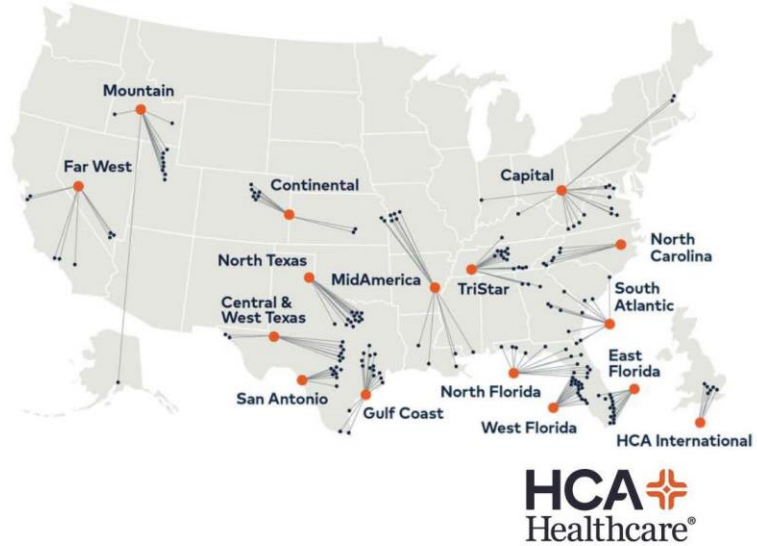

4 CHARGE 02112021 Extract v7 Release

## eFigure 2. HCA Starting Population Algorithm

### COVID-19 Clinical Care Episode Diagram

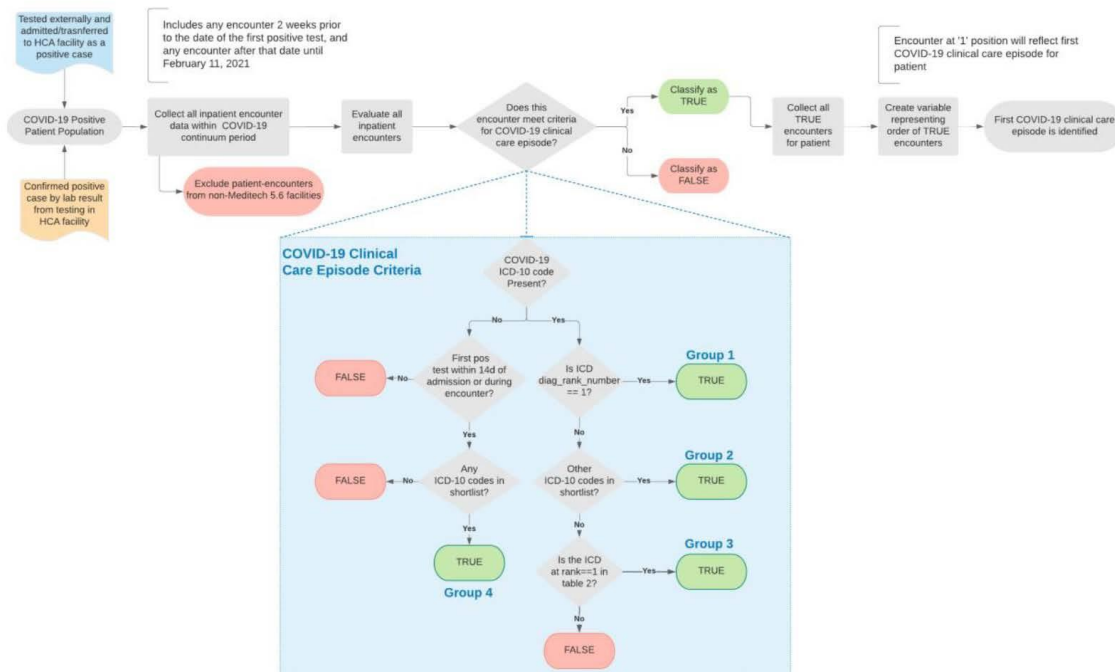

## eAppendix 1. Variables Identified as Confounders and Used for Adjustment

The list of potential confounding variables was identified through Stakeholder input and consultation with the HCA Healthcare / CHARGE Consortium Steering Committee.

Our causal model to define confounders was to enumerate all factors thought to be common causes of dexamethasone initiation and outcome, with particular emphasis on those factors that precede treatment and might be strongly related to outcome, as these are known to improve finite-sample efficiency, even if they don't play an explicit role in treatment decisions. From a clinical perspective, the question was: What factors might play a role in deciding whether to initiate dexamethasone that also impact mortality in the setting of COVID-19? Our team developed a list of such variables based on the literature and shared it with the HCA Healthcare / CHARGE Consortium Steering Committee.

The resulting list is as follows:

### **Community/Hospital level variables:**

- Hospital volume (bed size)
- Hospital ICU volume (ICU bed size)
- Region (4 category variable)

### **Patient variables:**

- Calendar time (measured continuously to capture changes over time)
- Time epoch: (Note Epochs are defined based on prior HCA research and periods 1-4 do not occur in our population)
  - 1="Epoch 1: March 2 - April 2, 2020"
  - 2="Epoch 2: April 3 - April 29, 2020"
  - 3="Epoch 3: April 30 - May 19, 2020"
  - 4="Epoch 4: May 20 - July 5, 2020"
  - 5="Epoch 5: July 6 - August 23, 2020"
  - 6="Epoch 6: August 24 - December 31, 2020"
  - 7="Epoch 7: Q1 2021"
  - 8="Epoch 8: Q2 2021"
  - 9="Epoch 9: Q3 2021"
  - 10="Epoch 10: Q4 2021"
- Age
- Sex
- Race/ethnicity (African American, Caucasian, Hispanic, others: American Indians, Asians) (race / ethnicity)
- Smoking
  - Smoking status categories:
    - Current smoker or smoker, current status unknown

- Former smoker
  - Never smoker
  - Unknown
- Minimum Spo2 at baseline
- BMI
  - BMI is derived from height and weight. Prior to calculating BMI we cleaned up height and weight using the following logic
    - Weight: values <50 lbs or >1000 lbs were set to missing
    - Height: values <3 ft or >8 ft were set to missing
- Medical history

For the following conditions we only used historical data (i.e. information from diagnosis history dataset which includes historical diagnoses captured in the EHR for the included patient population from January 1<sup>st</sup> 2018 to date, as well as any encounter that occurred before their index COVID encounter):

- Prior stroke
- Prior revascularization
- Prior myocardial infarction
- Prior pulmonary embolism
- Charlson comorbidity index

Historical procedures only:

- Prior dialysis

The conditions below could occur historically as defined above on page 4 or also on their index COVID encounter:

- Hypertension
- Hyperlipidemia
- Coronary artery disease (CAD)
- Diabetes
- Pre-diabetes
- Obesity
- Autoimmune disease
- Structural lung disease defined as a composite of:
  - Asthma
  - Chronic obstructive pulmonary disease (COPD)
  - Sarcoidosis
  - Interstitial lung disease (ILD/IPF)
- HIV/AIDS
- Cancer including the following separately:
  - Lymphoma / Leukemia
  - Solid tumors / malignancy
- Chronic Kidney Disease (CKD)

**Factors that may vary over the hospitalization.** These were evaluated at their most recent value upon eligibility for a particular cohort.

- Vital signs
  - Daily minimum oxygen saturation (SpO<sub>2</sub>)
  - SPO<sub>2</sub>/FiO<sub>2</sub> ratio. SpO<sub>2</sub> to FiO<sub>2</sub> ratio was calculated for each patient using the lowest SpO<sub>2</sub> and highest FiO<sub>2</sub> of the day.
    - Fraction of inspired oxygen (FiO<sub>2</sub>) was frequently missing and handled as follows. For those with missing FiO<sub>2</sub> in the no-oxygen group then missing was imputed to 21%. For those with missing FiO<sub>2</sub> in the oxygen group, liters per minute of oxygen (LPM) was used to impute FiO<sub>2</sub> by the following formula: 1 L/min = 24% FiO<sub>2</sub>, and 4% FiO<sub>2</sub> for every 1 L/min added to that (Duprez F, et al. A New Formula for Predicting the Fraction of Delivered Oxygen During Low-Flow Oxygen Therapy. *Respir Care*. 2018 Dec;63(12):1528-1534. doi: 10.4187/respcare.06243. PMID: 30467224)
- Hospital COVID prevalence
  - Daily COVID numbers at the hospital divided by the hospital bed size (number of patients relative to hospital capacity) averaged over the past 7 days at the hospital
- Labs
  - Creatinine converted to eGFR (Cockcroft Gault)
- In hospital interventions
  - Time since baseline (since admission date of COVID-19 hospitalizations until eligibility for a particular cohort)
  - Intensive care unit (ICU) Status (daily binary variable: 1 if in the ICU and 0 otherwise, based on icu\_start\_date, icu\_stop\_date)
  - Modified WHO ordinal scale: used to define cohorts (effectively non-parametric adjustment)
    - 2 = no supplemental oxygen received
    - 3 = received low-flow supplemental oxygen
    - 4 = received non-invasive or high-flow oxygen (CPAP, BIPAP)
    - 5 = received invasive mechanical ventilation
    - 6 = ECMO
- In hospital medications
  - Anti-coagulation (Heparin or Enoxaparin)
    - Prophylactic use
    - Treatment use
  - Remdesivir
  - Pressers (Norepinephrine, Epinephrine, Vasopressin, Phenylephrine, Dopamine)
  - Tocilizumab (in baseline table – too rare for modeling)
  - Baricitinib
  - Bamlanivimab + Etesevimab (in baseline table – too rare for modeling)
  - Casirivimab + Imdevimab (in baseline table – too rare for modeling)
  - Antibiotics
  - Azithromycin

## eAppendix 2. Study-Specific Inclusion and Exclusion Criteria

**Starting population:** All adults (age >17) hospitalized alive for at least 48 hours, between July 1, 2020 - October 31<sup>st</sup> 2021 for COVID-19 per CHARGE Consortium algorithm (if multiple hospitalizations meet the criteria this algorithm takes first as the index hospitalization) and having ICD-10 DX code for COVID-19 (in any position) AND ICD-10 DX code for respiratory illnesses (defined below)\*

\*ICD-10 DX Codes (in any position or rank, and A/I or F):

- COVID-19
  - U07.1,
- Acute Respiratory Illness
  - **J12.82 Pneumonia due to coronavirus disease 2019**
  - J12.89, Other viral pneumonia
  - J20.8, Acute Bronchitis due to other specified organisms
  - J40, Bronchitis not specified as acute or chronic
  - J22, Unspecified acute lower respiratory infection
  - J98.8, Other specified respiratory disorders
  - J80, Acute Respiratory Distress Syndrome
  - J96.00-J96.02, Acute Respiratory Failure
  - J96.2, Acute and chronic respiratory failure

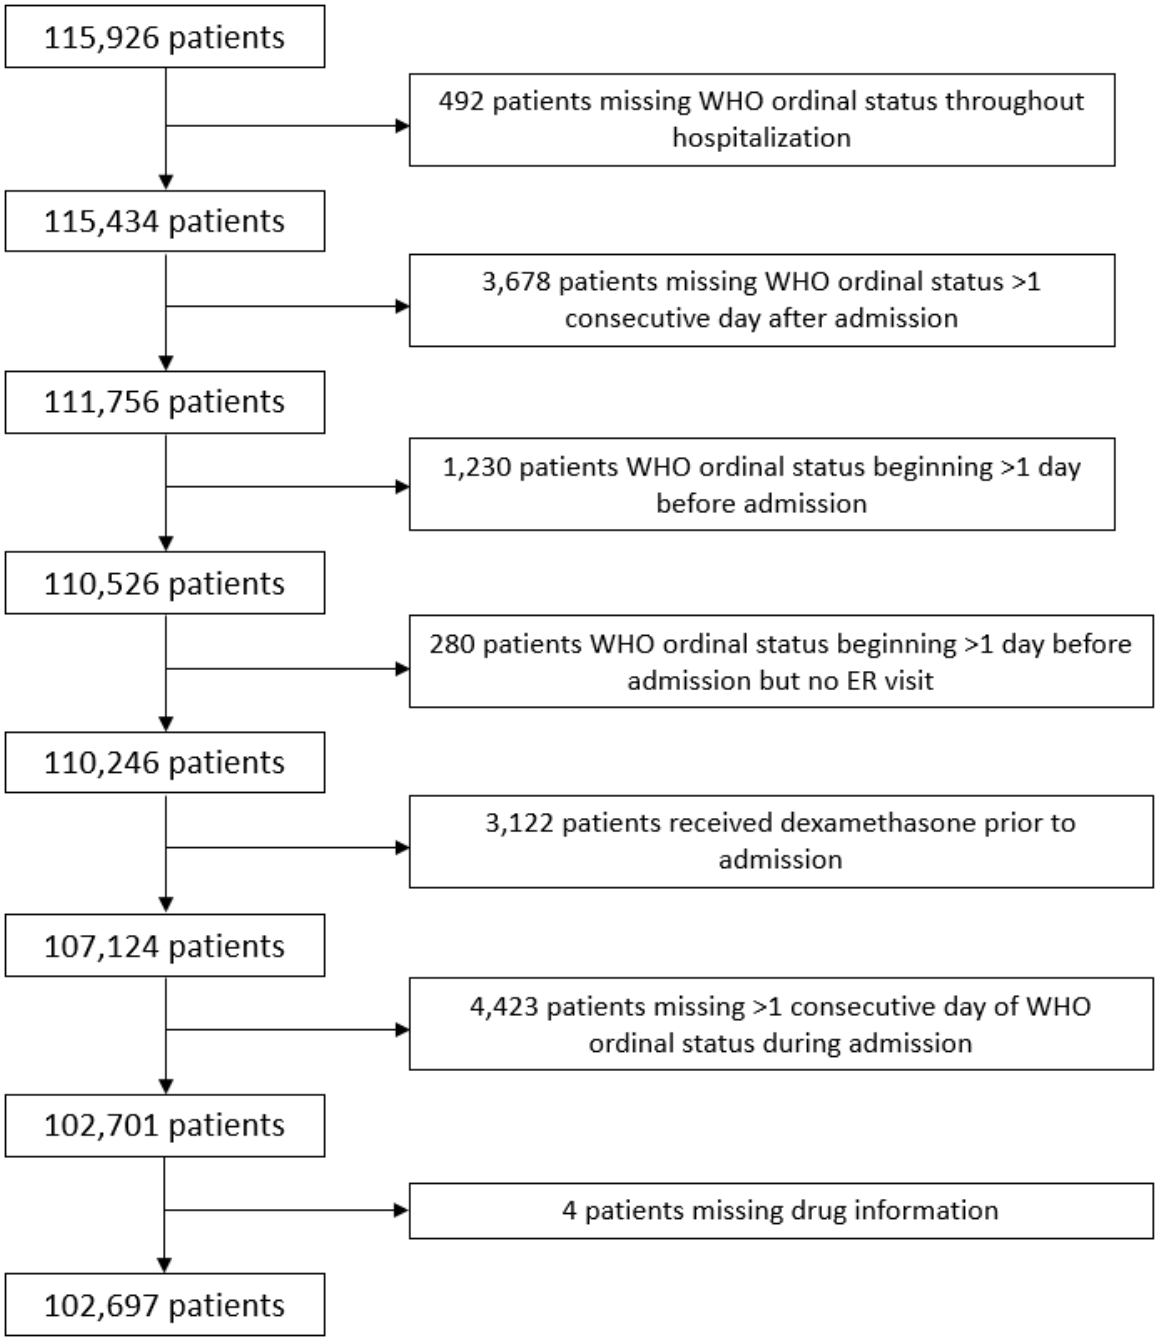

**eFigure 3.** Consort Diagram of Exclusions Applied to the Starting Population



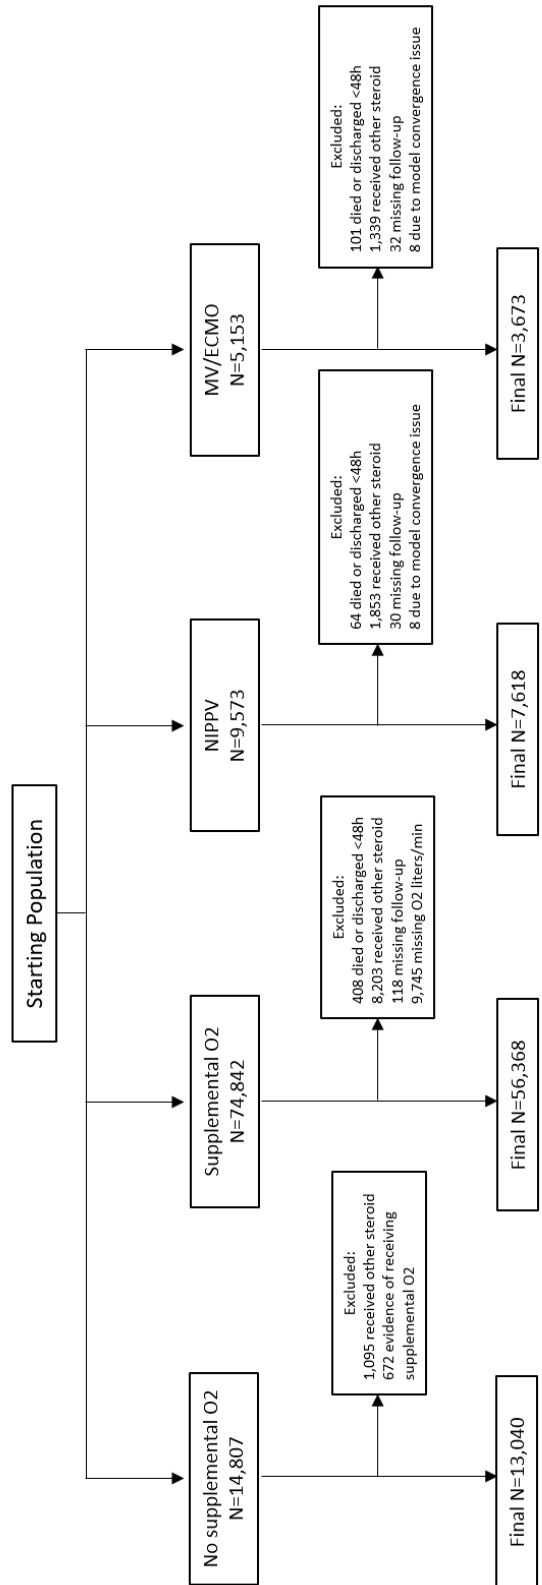

**eFigure 4.** Cohort-Specific Selection Applied at the Time of Eligibility for Each Cohort

**eTable 1.** Characteristics of Patients Eligible for the No Supplemental Oxygen Cohort

| Variable                              | Level      | Overall<br>(N=13040) |       | Control<br>(N=5503) |       | Dexamethasone<br>(N=7537) |       | Std Diff<br>Score* |
|---------------------------------------|------------|----------------------|-------|---------------------|-------|---------------------------|-------|--------------------|
| <b><u>Demographics</u></b>            |            |                      |       |                     |       |                           |       |                    |
| Hospital COVID<br>Prevalence++ /ranks | Median     | 13039                | 0.1   | 5503                | 0.1   | 7536                      | 0.1   | 4.18               |
|                                       | 25th       |                      | 0.1   |                     | 0.1   |                           | 0.1   |                    |
|                                       | 75th       |                      | 0.2   |                     | 0.2   |                           | 0.2   |                    |
|                                       | Mean       |                      | 0.1   |                     | 0.1   |                           | 0.1   |                    |
|                                       | STD        |                      | 0.1   |                     | 0.1   |                           | 0.1   |                    |
|                                       | Min        |                      | 0.0   |                     | 0.0   |                           | 0.0   |                    |
|                                       | Max        |                      | 0.7   |                     | 0.7   |                           | 0.7   |                    |
|                                       | Missing(%) |                      | 0.0   |                     | 0.0   |                           | 0.0   |                    |
| Number of Total Beds++<br>/ranks      | Median     | 13040                | 343.0 | 5503                | 347.0 | 7537                      | 342.0 | 8.14               |
|                                       | 25th       |                      | 240.0 |                     | 250.0 |                           | 231.0 |                    |
|                                       | 75th       |                      | 467.0 |                     | 471.0 |                           | 455.0 |                    |
|                                       | Mean       |                      | 363.0 |                     | 371.0 |                           | 357.2 |                    |
|                                       | STD        |                      | 173.5 |                     | 176.1 |                           | 171.3 |                    |
|                                       | Min        |                      | 34.0  |                     | 42.0  |                           | 34.0  |                    |
|                                       | Max        |                      | 899.0 |                     | 899.0 |                           | 899.0 |                    |
|                                       | Missing(%) |                      | 0.0   |                     | 0.0   |                           | 0.0   |                    |
| Number of ICU Beds++<br>/ranks        | Median     | 13040                | 36.0  | 5503                | 37.0  | 7537                      | 34.0  | 11.69              |
|                                       | 25th       |                      | 20.0  |                     | 21.0  |                           | 20.0  |                    |
|                                       | 75th       |                      | 50.0  |                     | 52.0  |                           | 50.0  |                    |
|                                       | Mean       |                      | 41.3  |                     | 43.2  |                           | 39.9  |                    |
|                                       | STD        |                      | 27.0  |                     | 28.0  |                           | 26.1  |                    |
|                                       | Min        |                      | 0.0   |                     | 0.0   |                           | 0.0   |                    |
|                                       | Max        |                      | 139.0 |                     | 139.0 |                           | 139.0 |                    |
|                                       | Missing(%) |                      | 0.0   |                     | 0.0   |                           | 0.0   |                    |
| Region                                | West       | 1414                 | 10.8  | 547                 | 9.9   | 867                       | 11.5  | 11.35              |

| Variable                             | Level                                     | Overall<br>(N=13040) |       | Control<br>(N=5503) |       | Dexamethasone<br>(N=7537) |       | Std Diff<br>Score* |
|--------------------------------------|-------------------------------------------|----------------------|-------|---------------------|-------|---------------------------|-------|--------------------|
|                                      | South                                     | 11176                | 85.7  | 4705                | 85.5  | 6471                      | 85.9  |                    |
|                                      | Midwest                                   | 382                  | 2.9   | 215                 | 3.9   | 167                       | 2.2   |                    |
|                                      | Northeast                                 | 54                   | 0.4   | 30                  | 0.5   | 24                        | 0.3   |                    |
|                                      | Missing                                   | 14                   | 0.1   | 6                   | 0.1   | 8                         | 0.1   |                    |
| Calendar Epoch Intervals++<br>/ranks | Epoch 10: Q4 2021                         | 244                  | 1.9   | 119                 | 2.2   | 125                       | 1.7   | 11.72              |
|                                      | Epoch 9: Q3 2021                          | 3126                 | 24.0  | 1272                | 23.1  | 1854                      | 24.6  |                    |
|                                      | Epoch 8: Q2 2021                          | 1040                 | 8.0   | 366                 | 6.7   | 674                       | 8.9   |                    |
|                                      | Epoch 7: Q1 2021                          | 2993                 | 23.0  | 1195                | 21.7  | 1798                      | 23.9  |                    |
|                                      | Epoch 6: August 24 -<br>December 31, 2020 | 3580                 | 27.5  | 1481                | 26.9  | 2099                      | 27.8  |                    |
|                                      | Epoch 5: July 6 - August<br>23, 2020      | 1843                 | 14.1  | 970                 | 17.6  | 873                       | 11.6  |                    |
|                                      | Epoch 4: May 20 - July 5,<br>2020         | 214                  | 1.6   | 100                 | 1.8   | 114                       | 1.5   |                    |
| Age++ /ranks                         | Median                                    | 13040                | 66.0  | 5503                | 68.0  | 7537                      | 64.0  | 14.51              |
|                                      | 25th                                      |                      | 52.0  |                     | 53.0  |                           | 51.0  |                    |
|                                      | 75th                                      |                      | 78.0  |                     | 79.0  |                           | 76.0  |                    |
|                                      | Mean                                      |                      | 64.0  |                     | 65.2  |                           | 63.1  |                    |
|                                      | STD                                       |                      | 17.6  |                     | 18.1  |                           | 17.2  |                    |
|                                      | Min                                       |                      | 18.0  |                     | 18.0  |                           | 18.0  |                    |
|                                      | Max                                       |                      | 104.0 |                     | 103.0 |                           | 104.0 |                    |
|                                      | Missing(%)                                |                      | 0.0   |                     | 0.0   |                           | 0.0   |                    |
| Age group++ /ranks                   | 3: 70+                                    | 5259                 | 40.3  | 2443                | 44.4  | 2816                      | 37.4  | 12.76              |
|                                      | 2: 51-70                                  | 4809                 | 36.9  | 1883                | 34.2  | 2926                      | 38.8  |                    |
|                                      | 1: 18-50                                  | 2972                 | 22.8  | 1177                | 21.4  | 1795                      | 23.8  |                    |
| Female                               | Yes                                       | 6379                 | 48.9  | 2738                | 49.8  | 3641                      | 48.3  | 2.89               |
|                                      | No                                        | 6661                 | 51.1  | 2765                | 50.2  | 3896                      | 51.7  |                    |

| Variable       | Level          | Overall<br>(N=13040) |      | Control<br>(N=5503) |      | Dexamethasone<br>(N=7537) |      | Std Diff<br>Score* |
|----------------|----------------|----------------------|------|---------------------|------|---------------------------|------|--------------------|
| Race           | Other          | 2609                 | 20.0 | 1051                | 19.1 | 1558                      | 20.7 | 5.71               |
|                | Black          | 2901                 | 22.2 | 1291                | 23.5 | 1610                      | 21.4 |                    |
|                | White          | 7530                 | 57.7 | 3161                | 57.4 | 4369                      | 58.0 |                    |
| Hispanic       | Yes            | 3121                 | 23.9 | 1238                | 22.5 | 1883                      | 25.0 | 5.85               |
|                | No             | 9919                 | 76.1 | 4265                | 77.5 | 5654                      | 75.0 |                    |
| Smoking        | Current smoker | 935                  | 7.2  | 483                 | 8.8  | 452                       | 6.0  | 16.97              |
|                | Former smoker  | 2680                 | 20.6 | 1131                | 20.6 | 1549                      | 20.6 |                    |
|                | Never smoker   | 8090                 | 62.0 | 3214                | 58.4 | 4876                      | 64.7 |                    |
|                | Unknown        | 1335                 | 10.2 | 675                 | 12.3 | 660                       | 8.8  |                    |
| BMI++ /ranks   | Median         | 10968                | 28.1 | 4463                | 27.4 | 6505                      | 28.6 | 22.80              |
|                | 25th           |                      | 24.5 |                     | 23.8 |                           | 25.1 |                    |
|                | 75th           |                      | 32.9 |                     | 31.9 |                           | 33.5 |                    |
|                | Mean           |                      | 29.3 |                     | 28.4 |                           | 30.0 |                    |
|                | STD            |                      | 7.2  |                     | 6.9  |                           | 7.3  |                    |
|                | Min            |                      | 11.6 |                     | 11.6 |                           | 12.1 |                    |
|                | Max            |                      | 76.2 |                     | 72.1 |                           | 76.2 |                    |
|                | Missing(%)     |                      | 15.9 |                     | 18.9 |                           | 13.7 |                    |
| Hypertension   | Yes            | 9634                 | 73.9 | 4270                | 77.6 | 5364                      | 71.2 | 14.76              |
|                | No             | 3406                 | 26.1 | 1233                | 22.4 | 2173                      | 28.8 |                    |
| Hyperlipidemia | Yes            | 6473                 | 49.6 | 2901                | 52.7 | 3572                      | 47.4 | 10.66              |
|                | No             | 6567                 | 50.4 | 2602                | 47.3 | 3965                      | 52.6 |                    |
| CAD            | Yes            | 3782                 | 29.0 | 1808                | 32.9 | 1974                      | 26.2 | 14.65              |
|                | No             | 9258                 | 71.0 | 3695                | 67.1 | 5563                      | 73.8 |                    |
| MI             | Yes            | 1523                 | 11.7 | 761                 | 13.8 | 762                       | 10.1 | 11.69              |
|                | No             | 11353                | 87.1 | 4662                | 84.7 | 6691                      | 88.8 |                    |

| Variable     | Level   | Overall<br>(N=13040) |      | Control<br>(N=5503) |      | Dexamethasone<br>(N=7537) |      | Std Diff<br>Score* |
|--------------|---------|----------------------|------|---------------------|------|---------------------------|------|--------------------|
|              | Missing | 164                  | 1.3  | 80                  | 1.5  | 84                        | 1.1  |                    |
| Diabetes     | Yes     | 5735                 | 44.0 | 2615                | 47.5 | 3120                      | 41.4 | 12.35              |
|              | No      | 7305                 | 56.0 | 2888                | 52.5 | 4417                      | 58.6 |                    |
| Pre-Diabetes | Yes     | 174                  | 1.3  | 68                  | 1.2  | 106                       | 1.4  | 1.50               |
|              | No      | 12866                | 98.7 | 5435                | 98.8 | 7431                      | 98.6 |                    |
| Obesity      | Yes     | 3891                 | 29.8 | 1505                | 27.3 | 2386                      | 31.7 | 9.46               |
|              | No      | 9149                 | 70.2 | 3998                | 72.7 | 5151                      | 68.3 |                    |
| Asthma       | Yes     | 1165                 | 8.9  | 401                 | 7.3  | 764                       | 10.1 | 10.12              |
|              | No      | 11875                | 91.1 | 5102                | 92.7 | 6773                      | 89.9 |                    |
| Autoimmune   | Yes     | 1363                 | 10.5 | 655                 | 11.9 | 708                       | 9.4  | 8.14               |
|              | No      | 11677                | 89.5 | 4848                | 88.1 | 6829                      | 90.6 |                    |
| COPD         | Yes     | 3135                 | 24.0 | 1259                | 22.9 | 1876                      | 24.9 | 4.72               |
|              | No      | 9905                 | 76.0 | 4244                | 77.1 | 5661                      | 75.1 |                    |
| Sarcoidosis  | Yes     | 27                   | 0.2  | 9                   | 0.2  | 18                        | 0.2  | 1.68               |
|              | No      | 13013                | 99.8 | 5494                | 99.8 | 7519                      | 99.8 |                    |
| ILD          | Yes     | 38                   | 0.3  | 16                  | 0.3  | 22                        | 0.3  | 0.02               |
|              | No      | 13002                | 99.7 | 5487                | 99.7 | 7515                      | 99.7 |                    |
| Stroke       | Yes     | 485                  | 3.7  | 287                 | 5.2  | 198                       | 2.6  | 13.52              |
|              | No      | 12391                | 95.0 | 5136                | 93.3 | 7255                      | 96.3 |                    |
|              | Missing | 164                  | 1.3  | 80                  | 1.5  | 84                        | 1.1  |                    |
| PE           | Yes     | 371                  | 2.8  | 168                 | 3.1  | 203                       | 2.7  | 2.23               |
|              | No      | 12505                | 95.9 | 5255                | 95.5 | 7250                      | 96.2 |                    |

| Variable                   | Level               | Overall<br>(N=13040) |      | Control<br>(N=5503) |      | Dexamethasone<br>(N=7537) |      | Std Diff<br>Score* |
|----------------------------|---------------------|----------------------|------|---------------------|------|---------------------------|------|--------------------|
|                            | Missing             | 164                  | 1.3  | 80                  | 1.5  | 84                        | 1.1  |                    |
| HIV/AIDS                   | Yes                 | 63                   | 0.5  | 37                  | 0.7  | 26                        | 0.3  | 4.60               |
|                            | No                  | 12977                | 99.5 | 5466                | 99.3 | 7511                      | 99.7 |                    |
| Lymphoma/Leukemia          | Yes                 | 199                  | 1.5  | 83                  | 1.5  | 116                       | 1.5  | 0.25               |
|                            | No                  | 12841                | 98.5 | 5420                | 98.5 | 7421                      | 98.5 |                    |
| Solid tumors               | Yes                 | 865                  | 6.6  | 457                 | 8.3  | 408                       | 5.4  | 11.46              |
|                            | No                  | 12175                | 93.4 | 5046                | 91.7 | 7129                      | 94.6 |                    |
| CKD                        | Yes                 | 6883                 | 52.8 | 3269                | 59.4 | 3614                      | 48.0 | 23.12              |
|                            | No                  | 6157                 | 47.2 | 2234                | 40.6 | 3923                      | 52.0 |                    |
| Prior Dialysis             | Yes                 | 46                   | 0.4  | 31                  | 0.6  | 15                        | 0.2  | 5.91               |
|                            | No                  | 12994                | 99.6 | 5472                | 99.4 | 7522                      | 99.8 |                    |
| Prior Revascularization    | Yes                 | 1556                 | 11.9 | 741                 | 13.5 | 815                       | 10.8 | 8.23               |
|                            | No                  | 11414                | 87.5 | 4726                | 85.9 | 6688                      | 88.7 |                    |
|                            | Missing             | 70                   | 0.5  | 36                  | 0.7  | 34                        | 0.5  |                    |
| Charlson Comorbidity Index | 2: 2+ comorbidities | 6270                 | 48.1 | 3073                | 55.8 | 3197                      | 42.4 | 29.37              |
|                            | 1: 1 comorbidity    | 3360                 | 25.8 | 1296                | 23.6 | 2064                      | 27.4 |                    |
|                            | 0: 0 conditions     | 3246                 | 24.9 | 1054                | 19.2 | 2192                      | 29.1 |                    |
|                            | Missing             | 164                  | 1.3  | 80                  | 1.5  | 84                        | 1.1  |                    |
| Baseline Spo2++ /ranks     | Median              | 13026                | 94.0 | 5497                | 95.0 | 7529                      | 94.0 | 52.36              |
|                            | 25th                |                      | 92.0 |                     | 93.0 |                           | 92.0 |                    |
|                            | 75th                |                      | 96.0 |                     | 96.0 |                           | 95.0 |                    |
|                            | Mean                |                      | 93.8 |                     | 94.5 |                           | 93.3 |                    |
|                            | STD                 |                      | 3.1  |                     | 3.1  |                           | 3.1  |                    |
|                            | Min                 |                      | 60.0 |                     | 60.0 |                           | 61.0 |                    |

| Variable      | Level              | Overall<br>(N=13040) |       | Control<br>(N=5503) |       | Dexamethasone<br>(N=7537) |       | Std Diff<br>Score* |       |       |
|---------------|--------------------|----------------------|-------|---------------------|-------|---------------------------|-------|--------------------|-------|-------|
| Spo2++ /ranks | Max                |                      | 100.0 |                     | 100.0 |                           | 100.0 | 15.53              |       |       |
|               | Missing(%)         |                      | 0.1   |                     | 0.1   |                           | 0.1   |                    |       |       |
|               | Median             | 13029                | 93.0  | 5497                | 94.0  | 7532                      | 93.0  |                    |       |       |
|               | 25th               |                      | 92.0  |                     | 92.0  |                           | 92.0  |                    |       |       |
|               | 75th               |                      | 95.0  |                     | 95.0  |                           | 95.0  |                    |       |       |
|               | Mean               |                      | 93.1  |                     | 93.3  |                           | 93.0  |                    |       |       |
|               | STD                |                      | 3.1   |                     | 3.2   |                           | 3.0   |                    |       |       |
|               | Min                |                      | 61.0  |                     | 62.0  |                           | 61.0  |                    |       |       |
|               | Max                |                      | 100.0 |                     | 100.0 |                           | 100.0 |                    |       |       |
|               | Missing(%)         |                      | 0.1   |                     | 0.1   |                           | 0.1   |                    |       |       |
| FiO2++ /ranks | Median             | 13040                | 21.0  | 5503                | 21.0  | 7537                      | 21.0  | .                  |       |       |
|               | 25th               |                      | 21.0  |                     | 21.0  |                           | 21.0  |                    |       |       |
|               | 75th               |                      | 21.0  |                     | 21.0  |                           | 21.0  |                    |       |       |
|               | Mean               |                      | 21.0  |                     | 21.0  |                           | 21.0  |                    |       |       |
|               | STD                |                      | 0.0   |                     | 0.0   |                           | 0.0   |                    |       |       |
|               | Min                |                      | 21.0  |                     | 21.0  |                           | 21.0  |                    |       |       |
|               | Max                |                      | 21.0  |                     | 21.0  |                           | 21.0  |                    |       |       |
|               | Missing(%)         |                      | 0.0   |                     | 0.0   |                           | 0.0   |                    |       |       |
|               | S/F ratio++ /ranks | Median               | 13029 | 4.4                 | 5497  | 4.5                       | 7532  |                    | 4.4   | 15.53 |
|               |                    | 25th                 |       | 4.4                 |       | 4.4                       |       |                    | 4.4   |       |
| 75th          |                    |                      | 4.5   |                     | 4.5   |                           | 4.5   |                    |       |       |
| Mean          |                    |                      | 4.4   |                     | 4.4   |                           | 4.4   |                    |       |       |
| STD           |                    |                      | 0.1   |                     | 0.2   |                           | 0.1   |                    |       |       |
| Min           |                    |                      | 2.9   |                     | 3.0   |                           | 2.9   |                    |       |       |
| Max           |                    |                      | 4.8   |                     | 4.8   |                           | 4.8   |                    |       |       |
| Missing(%)    |                    |                      | 0.1   |                     | 0.1   |                           | 0.1   |                    |       |       |
| eGFR++ /ranks |                    | Median               | 10848 | 78.4                | 4402  | 71.8                      | 6446  | 82.6               | 18.50 |       |
|               |                    | 25th                 |       | 47.3                |       | 41.3                      |       | 51.3               |       |       |

| Variable                         | Level      | Overall<br>(N=13040) |       | Control<br>(N=5503) |       | Dexamethasone<br>(N=7537) |       | Std Diff<br>Score* |
|----------------------------------|------------|----------------------|-------|---------------------|-------|---------------------------|-------|--------------------|
|                                  | 75th       |                      | 117.5 |                     | 112.5 |                           | 120.0 |                    |
|                                  | Mean       |                      | 76.9  |                     | 72.7  |                           | 79.7  |                    |
|                                  | STD        |                      | 35.7  |                     | 36.8  |                           | 34.7  |                    |
|                                  | Min        |                      | 2.1   |                     | 2.1   |                           | 2.4   |                    |
|                                  | Max        |                      | 120.0 |                     | 120.0 |                           | 120.0 |                    |
|                                  | Missing(%) |                      | 16.8  |                     | 20.0  |                           | 14.5  |                    |
| Time since admission++<br>/ranks | Median     | 13040                | 1.0   | 5503                | 1.0   | 7537                      | 1.0   | .                  |
|                                  | 25th       |                      | 1.0   |                     | 1.0   |                           | 1.0   |                    |
|                                  | 75th       |                      | 1.0   |                     | 1.0   |                           | 1.0   |                    |
|                                  | Mean       |                      | 1.0   |                     | 1.0   |                           | 1.0   |                    |
|                                  | STD        |                      | 0.0   |                     | 0.0   |                           | 0.0   |                    |
|                                  | Min        |                      | 1.0   |                     | 1.0   |                           | 1.0   |                    |
|                                  | Max        |                      | 1.0   |                     | 1.0   |                           | 1.0   |                    |
|                                  | Missing(%) |                      | 0.0   |                     | 0.0   |                           | 0.0   |                    |
| ICU                              | Yes        | 721                  | 5.5   | 430                 | 7.8   | 291                       | 3.9   | 16.92              |
|                                  | No         | 12319                | 94.5  | 5073                | 92.2  | 7246                      | 96.1  |                    |
| Anticoagulants<br>(prophylactic) | Yes        | 5750                 | 44.1  | 2720                | 49.4  | 3030                      | 40.2  | 18.63              |
|                                  | No         | 7290                 | 55.9  | 2783                | 50.6  | 4507                      | 59.8  |                    |
| Anticoagulants (treatment)       | Yes        | 1909                 | 14.6  | 891                 | 16.2  | 1018                      | 13.5  | 7.55               |
|                                  | No         | 11131                | 85.4  | 4612                | 83.8  | 6519                      | 86.5  |                    |
| Remdesivir                       | Yes        | 1047                 | 8.0   | 124                 | 2.3   | 923                       | 12.2  | 39.27              |
|                                  | No         | 11993                | 92.0  | 5379                | 97.7  | 6614                      | 87.8  |                    |
| Vasopressors                     | Yes        | 20                   | 0.2   | 15                  | 0.3   | 5                         | 0.1   | 5.02               |
|                                  | No         | 13020                | 99.8  | 5488                | 99.7  | 7532                      | 99.9  |                    |
| Tocilizumab                      | Yes        | 1                    | 0.0   | 0                   | 0.0   | 1                         | 0.0   | 1.63               |



| Variable                    | Level | Overall<br>(N=13040) |       | Control<br>(N=5503) |       | Dexamethasone<br>(N=7537) |       | Std Diff<br>Score* |
|-----------------------------|-------|----------------------|-------|---------------------|-------|---------------------------|-------|--------------------|
|                             | No    | 13039                | 100.0 | 5503                | 100.0 | 7536                      | 100.0 |                    |
| Baricitinib                 | Yes   | 7                    | 0.1   | 0                   | 0.0   | 7                         | 0.1   | 4.31               |
|                             | No    | 13033                | 99.9  | 5503                | 100.0 | 7530                      | 99.9  |                    |
| Bamlanivimab/<br>etesevimab | Yes   | 8                    | 0.1   | 3                   | 0.1   | 5                         | 0.1   | 0.48               |
|                             | No    | 13032                | 99.9  | 5500                | 99.9  | 7532                      | 99.9  |                    |
| Casirivimab/<br>Imdevimab   | Yes   | 39                   | 0.3   | 23                  | 0.4   | 16                        | 0.2   | 3.67               |
|                             | No    | 13001                | 99.7  | 5480                | 99.6  | 7521                      | 99.8  |                    |
| Azithromycin                | Yes   | 6959                 | 53.4  | 2157                | 39.2  | 4802                      | 63.7  | 50.60              |
|                             | No    | 6081                 | 46.6  | 3346                | 60.8  | 2735                      | 36.3  |                    |
| Antibiotics                 | Yes   | 10055                | 77.1  | 3940                | 71.6  | 6115                      | 81.1  | 22.59              |
|                             | No    | 2985                 | 22.9  | 1563                | 28.4  | 1422                      | 18.9  |                    |

\* Standardized difference scores measure the effect size between Control and Dexamethasone (All Standardized difference scores have been multiplied by 100).

++ /ranks indicates standardized difference score was calculated using rank statistics for the row variable.

**eTable 2.** Characteristics of Patients Eligible for the Supplemental Oxygen Cohort

| Variable                              | Level      | Overall<br>(N=56368) |       | Control<br>(N=7789) |       | Dexamethasone<br>(N=48579) |       | Std Diff<br>Score* |
|---------------------------------------|------------|----------------------|-------|---------------------|-------|----------------------------|-------|--------------------|
| <b>Demographics</b>                   |            |                      |       |                     |       |                            |       |                    |
| Hospital COVID<br>Prevalence++ /ranks | Median     | 56364                | 0.1   | 7789                | 0.1   | 48575                      | 0.1   | 6.34               |
|                                       | 25th       |                      | 0.1   |                     | 0.1   |                            | 0.1   |                    |
|                                       | 75th       |                      | 0.2   |                     | 0.2   |                            | 0.2   |                    |
|                                       | Mean       |                      | 0.1   |                     | 0.1   |                            | 0.1   |                    |
|                                       | STD        |                      | 0.1   |                     | 0.1   |                            | 0.1   |                    |
|                                       | Min        |                      | 0.0   |                     | 0.0   |                            | 0.0   |                    |
|                                       | Max        |                      | 0.9   |                     | 0.7   |                            | 0.9   |                    |
|                                       | Missing(%) |                      | 0.0   |                     | 0.0   |                            | 0.0   |                    |
| Number of Total Beds++<br>/ranks      | Median     | 56368                | 319.0 | 7789                | 323.0 | 48579                      | 319.0 | 4.08               |
|                                       | 25th       |                      | 227.0 |                     | 240.0 |                            | 227.0 |                    |
|                                       | 75th       |                      | 449.0 |                     | 455.0 |                            | 449.0 |                    |
|                                       | Mean       |                      | 347.7 |                     | 351.6 |                            | 347.1 |                    |
|                                       | STD        |                      | 177.6 |                     | 171.1 |                            | 178.6 |                    |
|                                       | Min        |                      | 34.0  |                     | 42.0  |                            | 34.0  |                    |
|                                       | Max        |                      | 899.0 |                     | 899.0 |                            | 899.0 |                    |
|                                       | Missing(%) |                      | 0.0   |                     | 0.0   |                            | 0.0   |                    |
| Number of ICU Beds++<br>/ranks        | Median     | 56368                | 34.0  | 7789                | 36.0  | 48579                      | 34.0  | 2.18               |
|                                       | 25th       |                      | 20.0  |                     | 20.0  |                            | 20.0  |                    |
|                                       | 75th       |                      | 48.0  |                     | 48.0  |                            | 48.0  |                    |
|                                       | Mean       |                      | 40.0  |                     | 40.1  |                            | 40.0  |                    |
|                                       | STD        |                      | 27.2  |                     | 26.4  |                            | 27.4  |                    |
|                                       | Min        |                      | 0.0   |                     | 0.0   |                            | 0.0   |                    |
|                                       | Max        |                      | 139.0 |                     | 139.0 |                            | 139.0 |                    |
|                                       | Missing(%) |                      | 0.0   |                     | 0.0   |                            | 0.0   |                    |
| Region                                | West       | 9206                 | 16.3  | 864                 | 11.1  | 8342                       | 17.2  | 19.50              |

| Variable                             | Level                                     | Overall<br>(N=56368) |       | Control<br>(N=7789) |       | Dexamethasone<br>(N=48579) |       | Std Diff<br>Score* |
|--------------------------------------|-------------------------------------------|----------------------|-------|---------------------|-------|----------------------------|-------|--------------------|
|                                      | South                                     | 45088                | 80.0  | 6522                | 83.7  | 38566                      | 79.4  |                    |
|                                      | Midwest                                   | 1830                 | 3.2   | 379                 | 4.9   | 1451                       | 3.0   |                    |
|                                      | Northeast                                 | 169                  | 0.3   | 19                  | 0.2   | 150                        | 0.3   |                    |
|                                      | Missing                                   | 75                   | 0.1   | 5                   | 0.1   | 70                         | 0.1   |                    |
| Calendar Epoch Intervals++<br>/ranks | Epoch 10: Q4 2021                         | 1465                 | 2.6   | 178                 | 2.3   | 1287                       | 2.6   | 19.82              |
|                                      | Epoch 9: Q3 2021                          | 15819                | 28.1  | 1890                | 24.3  | 13929                      | 28.7  |                    |
|                                      | Epoch 8: Q2 2021                          | 4389                 | 7.8   | 485                 | 6.2   | 3904                       | 8.0   |                    |
|                                      | Epoch 7: Q1 2021                          | 12128                | 21.5  | 1608                | 20.6  | 10520                      | 21.7  |                    |
|                                      | Epoch 6: August 24 -<br>December 31, 2020 | 15226                | 27.0  | 1961                | 25.2  | 13265                      | 27.3  |                    |
|                                      | Epoch 5: July 6 - August<br>23, 2020      | 6602                 | 11.7  | 1501                | 19.3  | 5101                       | 10.5  |                    |
|                                      | Epoch 4: May 20 - July 5,<br>2020         | 739                  | 1.3   | 166                 | 2.1   | 573                        | 1.2   |                    |
| Age++ /ranks                         | Median                                    | 56368                | 65.0  | 7789                | 70.0  | 48579                      | 64.0  | 35.09              |
|                                      | 25th                                      |                      | 52.0  |                     | 58.0  |                            | 51.0  |                    |
|                                      | 75th                                      |                      | 76.0  |                     | 81.0  |                            | 75.0  |                    |
|                                      | Mean                                      |                      | 63.4  |                     | 68.2  |                            | 62.7  |                    |
|                                      | STD                                       |                      | 16.6  |                     | 16.5  |                            | 16.5  |                    |
|                                      | Min                                       |                      | 18.0  |                     | 18.0  |                            | 18.0  |                    |
|                                      | Max                                       |                      | 109.0 |                     | 103.0 |                            | 109.0 |                    |
|                                      | Missing(%)                                |                      | 0.0   |                     | 0.0   |                            | 0.0   |                    |
| Age group++ /ranks                   | 3: 70+                                    | 20807                | 36.9  | 3874                | 49.7  | 16933                      | 34.9  | 31.60              |
|                                      | 2: 51-70                                  | 22807                | 40.5  | 2715                | 34.9  | 20092                      | 41.4  |                    |
|                                      | 1: 18-50                                  | 12754                | 22.6  | 1200                | 15.4  | 11554                      | 23.8  |                    |
| Female                               | Yes                                       | 26619                | 47.2  | 4019                | 51.6  | 22600                      | 46.5  | 10.17              |
|                                      | No                                        | 29749                | 52.8  | 3770                | 48.4  | 25979                      | 53.5  |                    |

| Variable       | Level          | Overall<br>(N=56368) |       | Control<br>(N=7789) |      | Dexamethasone<br>(N=48579) |       | Std Diff<br>Score* |
|----------------|----------------|----------------------|-------|---------------------|------|----------------------------|-------|--------------------|
| Race           | Other          | 12802                | 22.7  | 1358                | 17.4 | 11444                      | 23.6  | 18.38              |
|                | Black          | 8610                 | 15.3  | 1530                | 19.6 | 7080                       | 14.6  |                    |
|                | White          | 34956                | 62.0  | 4901                | 62.9 | 30055                      | 61.9  |                    |
| Hispanic       | Yes            | 14401                | 25.5  | 1691                | 21.7 | 12710                      | 26.2  | 10.45              |
|                | No             | 41967                | 74.5  | 6098                | 78.3 | 35869                      | 73.8  |                    |
| Smoking        | Current smoker | 2823                 | 5.0   | 523                 | 6.7  | 2300                       | 4.7   | 20.56              |
|                | Former smoker  | 13042                | 23.1  | 1863                | 23.9 | 11179                      | 23.0  |                    |
|                | Never smoker   | 34712                | 61.6  | 4246                | 54.5 | 30466                      | 62.7  |                    |
|                | Unknown        | 5791                 | 10.3  | 1157                | 14.9 | 4634                       | 9.5   |                    |
| BMI++ /ranks   | Median         | 48895                | 30.2  | 6465                | 28.5 | 42430                      | 30.4  | 25.35              |
|                | 25th           |                      | 26.0  |                     | 24.5 |                            | 26.4  |                    |
|                | 75th           |                      | 35.6  |                     | 34.0 |                            | 35.8  |                    |
|                | Mean           |                      | 31.6  |                     | 30.1 |                            | 31.8  |                    |
|                | STD            |                      | 8.1   |                     | 8.1  |                            | 8.1   |                    |
|                | Min            |                      | 8.0   |                     | 9.2  |                            | 8.0   |                    |
|                | Max            |                      | 137.3 |                     | 92.6 |                            | 137.3 |                    |
|                | Missing(%)     |                      | 13.3  |                     | 17.0 |                            | 12.7  |                    |
| Hypertension   | Yes            | 40177                | 71.3  | 6332                | 81.3 | 33845                      | 69.7  | 27.27              |
|                | No             | 16191                | 28.7  | 1457                | 18.7 | 14734                      | 30.3  |                    |
| Hyperlipidemia | Yes            | 26733                | 47.4  | 4426                | 56.8 | 22307                      | 45.9  | 21.95              |
|                | No             | 29635                | 52.6  | 3363                | 43.2 | 26272                      | 54.1  |                    |
| CAD            | Yes            | 15224                | 27.0  | 2979                | 38.2 | 12245                      | 25.2  | 28.30              |
|                | No             | 41144                | 73.0  | 4810                | 61.8 | 36334                      | 74.8  |                    |
| MI             | Yes            | 6315                 | 11.2  | 1322                | 17.0 | 4993                       | 10.3  | 19.74              |
|                | No             | 49103                | 87.1  | 6346                | 81.5 | 42757                      | 88.0  |                    |

| Variable     | Level   | Overall<br>(N=56368) |      | Control<br>(N=7789) |      | Dexamethasone<br>(N=48579) |      | Std Diff<br>Score* |
|--------------|---------|----------------------|------|---------------------|------|----------------------------|------|--------------------|
|              | Missing | 950                  | 1.7  | 121                 | 1.6  | 829                        | 1.7  |                    |
| Diabetes     | Yes     | 25079                | 44.5 | 3926                | 50.4 | 21153                      | 43.5 | 13.78              |
|              | No      | 31289                | 55.5 | 3863                | 49.6 | 27426                      | 56.5 |                    |
| Pre-Diabetes | Yes     | 1071                 | 1.9  | 83                  | 1.1  | 988                        | 2.0  | 7.84               |
|              | No      | 55297                | 98.1 | 7706                | 98.9 | 47591                      | 98.0 |                    |
| Obesity      | Yes     | 23033                | 40.9 | 2937                | 37.7 | 20096                      | 41.4 | 7.49               |
|              | No      | 33335                | 59.1 | 4852                | 62.3 | 28483                      | 58.6 |                    |
| Asthma       | Yes     | 5172                 | 9.2  | 706                 | 9.1  | 4466                       | 9.2  | 0.45               |
|              | No      | 51196                | 90.8 | 7083                | 90.9 | 44113                      | 90.8 |                    |
| Autoimmune   | Yes     | 4604                 | 8.2  | 931                 | 12.0 | 3673                       | 7.6  | 14.84              |
|              | No      | 51764                | 91.8 | 6858                | 88.0 | 44906                      | 92.4 |                    |
| COPD         | Yes     | 15619                | 27.7 | 2704                | 34.7 | 12915                      | 26.6 | 17.70              |
|              | No      | 40749                | 72.3 | 5085                | 65.3 | 35664                      | 73.4 |                    |
| Sarcoidosis  | Yes     | 153                  | 0.3  | 15                  | 0.2  | 138                        | 0.3  | 1.88               |
|              | No      | 56215                | 99.7 | 7774                | 99.8 | 48441                      | 99.7 |                    |
| ILD          | Yes     | 241                  | 0.4  | 44                  | 0.6  | 197                        | 0.4  | 2.29               |
|              | No      | 56127                | 99.6 | 7745                | 99.4 | 48382                      | 99.6 |                    |
| Stroke       | Yes     | 1516                 | 2.7  | 386                 | 5.0  | 1130                       | 2.3  | 14.17              |
|              | No      | 53902                | 95.6 | 7282                | 93.5 | 46620                      | 96.0 |                    |
|              | Missing | 950                  | 1.7  | 121                 | 1.6  | 829                        | 1.7  |                    |
| PE           | Yes     | 1924                 | 3.4  | 345                 | 4.4  | 1579                       | 3.3  | 6.16               |
|              | No      | 53494                | 94.9 | 7323                | 94.0 | 46171                      | 95.0 |                    |

| Variable                   | Level               | Overall<br>(N=56368) |      | Control<br>(N=7789) |      | Dexamethasone<br>(N=48579) |      | Std Diff<br>Score* |
|----------------------------|---------------------|----------------------|------|---------------------|------|----------------------------|------|--------------------|
|                            | Missing             | 950                  | 1.7  | 121                 | 1.6  | 829                        | 1.7  |                    |
| HIV/AIDS                   | Yes                 | 156                  | 0.3  | 35                  | 0.4  | 121                        | 0.2  | 3.40               |
|                            | No                  | 56212                | 99.7 | 7754                | 99.6 | 48458                      | 99.8 |                    |
| Lymphoma/Leukemia          | Yes                 | 753                  | 1.3  | 127                 | 1.6  | 626                        | 1.3  | 2.85               |
|                            | No                  | 55615                | 98.7 | 7662                | 98.4 | 47953                      | 98.7 |                    |
| Solid tumors               | Yes                 | 2965                 | 5.3  | 635                 | 8.2  | 2330                       | 4.8  | 13.67              |
|                            | No                  | 53403                | 94.7 | 7154                | 91.8 | 46249                      | 95.2 |                    |
| CKD                        | Yes                 | 29369                | 52.1 | 4930                | 63.3 | 24439                      | 50.3 | 26.45              |
|                            | No                  | 26999                | 47.9 | 2859                | 36.7 | 24140                      | 49.7 |                    |
| Prior Dialysis             | Yes                 | 156                  | 0.3  | 51                  | 0.7  | 105                        | 0.2  | 6.67               |
|                            | No                  | 56212                | 99.7 | 7738                | 99.3 | 48474                      | 99.8 |                    |
| Prior Revascularization    | Yes                 | 6208                 | 11.0 | 1233                | 15.8 | 4975                       | 10.2 | 16.75              |
|                            | No                  | 49631                | 88.0 | 6482                | 83.2 | 43149                      | 88.8 |                    |
|                            | Missing             | 529                  | 0.9  | 74                  | 1.0  | 455                        | 0.9  |                    |
| Charlson Comorbidity Index | 2: 2+ comorbidities | 24731                | 43.9 | 4781                | 61.4 | 19950                      | 41.1 | 43.96              |
|                            | 1: 1 comorbidity    | 15203                | 27.0 | 1671                | 21.5 | 13532                      | 27.9 |                    |
|                            | 0: 0 conditions     | 15484                | 27.5 | 1216                | 15.6 | 14268                      | 29.4 |                    |
|                            | Missing             | 950                  | 1.7  | 121                 | 1.6  | 829                        | 1.7  |                    |
| Baseline Spo2++ /ranks     | Median              | 55939                | 91.0 | 7761                | 93.0 | 48178                      | 90.0 | 59.79              |
|                            | 25th                |                      | 88.0 |                     | 90.0 |                            | 87.0 |                    |
|                            | 75th                |                      | 93.0 |                     | 95.0 |                            | 93.0 |                    |
|                            | Mean                |                      | 89.6 |                     | 91.9 |                            | 89.2 |                    |
|                            | STD                 |                      | 5.6  |                     | 4.7  |                            | 5.6  |                    |
|                            | Min                 |                      | 60.0 |                     | 60.0 |                            | 60.0 |                    |

| Variable      | Level              | Overall<br>(N=56368) |       | Control<br>(N=7789) |       | Dexamethasone<br>(N=48579) |       | Std Diff<br>Score* |       |       |
|---------------|--------------------|----------------------|-------|---------------------|-------|----------------------------|-------|--------------------|-------|-------|
| Spo2++ /ranks | Max                |                      | 100.0 |                     | 100.0 |                            | 100.0 | 41.84              |       |       |
|               | Missing(%)         |                      | 0.8   |                     | 0.4   |                            | 0.8   |                    |       |       |
|               | Median             | 55934                | 90.0  | 7753                | 92.0  | 48181                      | 90.0  |                    |       |       |
|               | 25th               |                      | 88.0  |                     | 90.0  |                            | 87.0  |                    |       |       |
|               | 75th               |                      | 93.0  |                     | 94.0  |                            | 92.0  |                    |       |       |
|               | Mean               |                      | 89.4  |                     | 91.0  |                            | 89.1  |                    |       |       |
|               | STD                |                      | 5.4   |                     | 4.5   |                            | 5.4   |                    |       |       |
|               | Min                |                      | 60.0  |                     | 60.0  |                            | 60.0  |                    |       |       |
|               | Max                |                      | 100.0 |                     | 100.0 |                            | 100.0 |                    |       |       |
|               | Missing(%)         |                      | 0.8   |                     | 0.5   |                            | 0.8   |                    |       |       |
| FiO2++ /ranks | Median             | 56368                | 36.0  | 7789                | 32.0  | 48579                      | 36.0  | 33.12              |       |       |
|               | 25th               |                      | 28.0  |                     | 28.0  |                            | 28.0  |                    |       |       |
|               | 75th               |                      | 48.0  |                     | 38.0  |                            | 50.0  |                    |       |       |
|               | Mean               |                      | 45.3  |                     | 39.5  |                            | 46.3  |                    |       |       |
|               | STD                |                      | 24.6  |                     | 20.5  |                            | 25.0  |                    |       |       |
|               | Min                |                      | 21.0  |                     | 21.0  |                            | 21.0  |                    |       |       |
|               | Max                |                      | 100.0 |                     | 100.0 |                            | 100.0 |                    |       |       |
|               | Missing(%)         |                      | 0.0   |                     | 0.0   |                            | 0.0   |                    |       |       |
|               | S/F ratio++ /ranks | Median               | 55934 | 2.6                 | 7753  | 2.9                        | 48181 |                    | 2.6   | 37.27 |
|               |                    | 25th                 |       | 1.9                 |       | 2.3                        |       |                    | 1.8   |       |
| 75th          |                    |                      | 3.2   |                     | 3.3   |                            | 3.1   |                    |       |       |
| Mean          |                    |                      | 2.4   |                     | 2.7   |                            | 2.4   |                    |       |       |
| STD           |                    |                      | 0.9   |                     | 0.8   |                            | 0.9   |                    |       |       |
| Min           |                    |                      | 0.6   |                     | 0.6   |                            | 0.6   |                    |       |       |
| Max           |                    |                      | 4.8   |                     | 4.7   |                            | 4.8   |                    |       |       |
| Missing(%)    |                    |                      | 0.8   |                     | 0.5   |                            | 0.8   |                    |       |       |
| eGFR++ /ranks |                    | Median               | 48422 | 86.8                | 6409  | 69.9                       | 42013 | 89.0               | 31.83 |       |
|               |                    | 25th                 |       | 53.7                |       | 39.8                       |       | 56.3               |       |       |

| Variable                      | Level                             | Overall<br>(N=56368) |       | Control<br>(N=7789) |       | Dexamethasone<br>(N=48579) |       | Std Diff<br>Score* |
|-------------------------------|-----------------------------------|----------------------|-------|---------------------|-------|----------------------------|-------|--------------------|
|                               | 75th                              |                      | 120.0 |                     | 112.0 |                            | 120.0 |                    |
|                               | Mean                              |                      | 82.1  |                     | 71.6  |                            | 83.7  |                    |
|                               | STD                               |                      | 34.9  |                     | 37.3  |                            | 34.2  |                    |
|                               | Min                               |                      | 2.2   |                     | 3.0   |                            | 2.2   |                    |
|                               | Max                               |                      | 120.0 |                     | 120.0 |                            | 120.0 |                    |
|                               | Missing(%)                        |                      | 14.1  |                     | 17.7  |                            | 13.5  |                    |
| Oxygen L/min++ /ranks         | 1: greater than 15 L/min          | 5460                 | 9.7   | 382                 | 4.9   | 5078                       | 10.5  | 20.95              |
|                               | 0: less than or equal to 15 L/min | 50908                | 90.3  | 7407                | 95.1  | 43501                      | 89.5  |                    |
| Time since admission++ /ranks | Median                            | 56368                | 1.0   | 7789                | 1.0   | 48579                      | 1.0   | 52.91              |
|                               | 25th                              |                      | 1.0   |                     | 1.0   |                            | 1.0   |                    |
|                               | 75th                              |                      | 1.0   |                     | 1.0   |                            | 1.0   |                    |
|                               | Mean                              |                      | 1.1   |                     | 1.4   |                            | 1.0   |                    |
|                               | STD                               |                      | 0.6   |                     | 1.1   |                            | 0.4   |                    |
|                               | Min                               |                      | 1.0   |                     | 1.0   |                            | 1.0   |                    |
|                               | Max                               |                      | 36.0  |                     | 19.0  |                            | 36.0  |                    |
|                               | Missing(%)                        |                      | 0.0   |                     | 0.0   |                            | 0.0   |                    |
| ICU                           | Yes                               | 6398                 | 11.4  | 1211                | 15.5  | 5187                       | 10.7  | 14.47              |
|                               | No                                | 49970                | 88.6  | 6578                | 84.5  | 43392                      | 89.3  |                    |
| Anticoagulants (prophylactic) | Yes                               | 25745                | 45.7  | 3802                | 48.8  | 21943                      | 45.2  | 7.30               |
|                               | No                                | 30623                | 54.3  | 3987                | 51.2  | 26636                      | 54.8  |                    |
| Anticoagulants (treatment)    | Yes                               | 11145                | 19.8  | 1712                | 22.0  | 9433                       | 19.4  | 6.33               |
|                               | No                                | 45223                | 80.2  | 6077                | 78.0  | 39146                      | 80.6  |                    |
| Remdesivir                    | Yes                               | 20284                | 36.0  | 1454                | 18.7  | 18830                      | 38.8  | 45.55              |
|                               | No                                | 36084                | 64.0  | 6335                | 81.3  | 29749                      | 61.2  |                    |



| Variable                | Level | Overall<br>(N=56368) |       | Control<br>(N=7789) |       | Dexamethasone<br>(N=48579) |       | Std Diff<br>Score* |
|-------------------------|-------|----------------------|-------|---------------------|-------|----------------------------|-------|--------------------|
| Vasopressors            | Yes   | 191                  | 0.3   | 66                  | 0.8   | 125                        | 0.3   | 7.97               |
|                         | No    | 56177                | 99.7  | 7723                | 99.2  | 48454                      | 99.7  |                    |
| Tocilizumab             | Yes   | 262                  | 0.5   | 15                  | 0.2   | 247                        | 0.5   | 5.35               |
|                         | No    | 56106                | 99.5  | 7774                | 99.8  | 48332                      | 99.5  |                    |
| Baricitinib             | Yes   | 311                  | 0.6   | 23                  | 0.3   | 288                        | 0.6   | 4.48               |
|                         | No    | 56057                | 99.4  | 7766                | 99.7  | 48291                      | 99.4  |                    |
| Bamlanivimab/Etesevimab | Yes   | 8                    | 0.0   | 1                   | 0.0   | 7                          | 0.0   | 0.13               |
|                         | No    | 56360                | 100.0 | 7788                | 100.0 | 48572                      | 100.0 |                    |
| Casirivimab/Imdevimab   | Yes   | 82                   | 0.1   | 19                  | 0.2   | 63                         | 0.1   | 2.65               |
|                         | No    | 56286                | 99.9  | 7770                | 99.8  | 48516                      | 99.9  |                    |
| Azithromycin            | Yes   | 33421                | 59.3  | 3583                | 46.0  | 29838                      | 61.4  | 31.30              |
|                         | No    | 22947                | 40.7  | 4206                | 54.0  | 18741                      | 38.6  |                    |
| Antibiotics             | Yes   | 45014                | 79.9  | 6159                | 79.1  | 38855                      | 80.0  | 2.26               |
|                         | No    | 11354                | 20.1  | 1630                | 20.9  | 9724                       | 20.0  |                    |

\* Standardized difference scores measure the effect size between Control and Dexamethasone (All Standardized difference scores have been multiplied by 100).

++ /ranks indicates standardized difference score was calculated using rank statistics for the row variable.

**eTable 3.** Characteristics of Patients Eligible for the Noninvasive Positive Pressure Ventilation (NIPPV) Cohort

| Variable                              | Level      | Overall<br>(N=7618) |       | Control<br>(N=792) |       | Dexamethasone<br>(N=6826) |       | Std Diff<br>Score* |
|---------------------------------------|------------|---------------------|-------|--------------------|-------|---------------------------|-------|--------------------|
| <b>Demographics</b>                   |            |                     |       |                    |       |                           |       |                    |
| Hospital COVID<br>Prevalence++ /ranks | Median     | 7618                | 0.1   | 792                | 0.1   | 6826                      | 0.1   | 3.33               |
|                                       | 25th       |                     | 0.1   |                    | 0.1   |                           | 0.1   |                    |
|                                       | 75th       |                     | 0.2   |                    | 0.2   |                           | 0.2   |                    |
|                                       | Mean       |                     | 0.2   |                    | 0.2   |                           | 0.2   |                    |
|                                       | STD        |                     | 0.1   |                    | 0.1   |                           | 0.1   |                    |
|                                       | Min        |                     | 0.0   |                    | 0.0   |                           | 0.0   |                    |
|                                       | Max        |                     | 0.7   |                    | 0.6   |                           | 0.7   |                    |
|                                       | Missing(%) |                     | 0.0   |                    | 0.0   |                           | 0.0   |                    |
| Number of Total Beds++<br>/ranks      | Median     | 7618                | 319.0 | 792                | 298.5 | 6826                      | 319.0 | 7.33               |
|                                       | 25th       |                     | 227.0 |                    | 221.0 |                           | 227.0 |                    |
|                                       | 75th       |                     | 447.0 |                    | 450.0 |                           | 447.0 |                    |
|                                       | Mean       |                     | 337.4 |                    | 328.6 |                           | 338.4 |                    |
|                                       | STD        |                     | 157.8 |                    | 160.5 |                           | 157.4 |                    |
|                                       | Min        |                     | 50.0  |                    | 61.0  |                           | 50.0  |                    |
|                                       | Max        |                     | 899.0 |                    | 899.0 |                           | 899.0 |                    |
|                                       | Missing(%) |                     | 0.0   |                    | 0.0   |                           | 0.0   |                    |
| Number of ICU Beds++<br>/ranks        | Median     | 7618                | 34.0  | 792                | 32.0  | 6826                      | 36.0  | 4.46               |
|                                       | 25th       |                     | 20.0  |                    | 19.0  |                           | 20.0  |                    |
|                                       | 75th       |                     | 48.0  |                    | 48.0  |                           | 48.0  |                    |
|                                       | Mean       |                     | 38.0  |                    | 36.8  |                           | 38.2  |                    |
|                                       | STD        |                     | 23.7  |                    | 22.5  |                           | 23.8  |                    |
|                                       | Min        |                     | 0.0   |                    | 6.0   |                           | 0.0   |                    |
|                                       | Max        |                     | 139.0 |                    | 139.0 |                           | 139.0 |                    |
|                                       | Missing(%) |                     | 0.0   |                    | 0.0   |                           | 0.0   |                    |
| Region                                | West       | 826                 | 10.8  | 39                 | 4.9   | 787                       | 11.5  | 36.96              |

| Variable                             | Level                                     | Overall<br>(N=7618) |       | Control<br>(N=792) |      | Dexamethasone<br>(N=6826) |       | Std Diff<br>Score* |
|--------------------------------------|-------------------------------------------|---------------------|-------|--------------------|------|---------------------------|-------|--------------------|
|                                      | South                                     | 6389                | 83.9  | 655                | 82.7 | 5734                      | 84.0  |                    |
|                                      | Midwest                                   | 390                 | 5.1   | 98                 | 12.4 | 292                       | 4.3   |                    |
|                                      | Missing                                   | 13                  | 0.2   | 0                  | 0.0  | 13                        | 0.2   |                    |
| Calendar Epoch Intervals++<br>/ranks | Epoch 10: Q4 2021                         | 144                 | 1.9   | 14                 | 1.8  | 130                       | 1.9   | 2.40               |
|                                      | Epoch 9: Q3 2021                          | 2460                | 32.3  | 267                | 33.7 | 2193                      | 32.1  |                    |
|                                      | Epoch 8: Q2 2021                          | 518                 | 6.8   | 51                 | 6.4  | 467                       | 6.8   |                    |
|                                      | Epoch 7: Q1 2021                          | 1534                | 20.1  | 132                | 16.7 | 1402                      | 20.5  |                    |
|                                      | Epoch 6: August 24 -<br>December 31, 2020 | 2005                | 26.3  | 211                | 26.6 | 1794                      | 26.3  |                    |
|                                      | Epoch 5: July 6 - August<br>23, 2020      | 873                 | 11.5  | 113                | 14.3 | 760                       | 11.1  |                    |
|                                      | Epoch 4: May 20 - July 5,<br>2020         | 84                  | 1.1   | 4                  | 0.5  | 80                        | 1.2   |                    |
| Age++ /ranks                         | Median                                    | 7618                | 65.0  | 792                | 68.0 | 6826                      | 65.0  | 22.65              |
|                                      | 25th                                      |                     | 54.0  |                    | 58.0 |                           | 54.0  |                    |
|                                      | 75th                                      |                     | 75.0  |                    | 77.0 |                           | 75.0  |                    |
|                                      | Mean                                      |                     | 64.1  |                    | 67.2 |                           | 63.8  |                    |
|                                      | STD                                       |                     | 14.9  |                    | 14.1 |                           | 14.9  |                    |
|                                      | Min                                       |                     | 18.0  |                    | 23.0 |                           | 18.0  |                    |
|                                      | Max                                       |                     | 102.0 |                    | 99.0 |                           | 102.0 |                    |
|                                      | Missing(%)                                |                     | 0.0   |                    | 0.0  |                           | 0.0   |                    |
| Age group++ /ranks                   | 3: 70+                                    | 2732                | 35.9  | 342                | 43.2 | 2390                      | 35.0  | 21.64              |
|                                      | 2: 51-70                                  | 3466                | 45.5  | 354                | 44.7 | 3112                      | 45.6  |                    |
|                                      | 1: 18-50                                  | 1420                | 18.6  | 96                 | 12.1 | 1324                      | 19.4  |                    |
| Female                               | Yes                                       | 3113                | 40.9  | 369                | 46.6 | 2744                      | 40.2  | 12.92              |
|                                      | No                                        | 4505                | 59.1  | 423                | 53.4 | 4082                      | 59.8  |                    |
| Race                                 | Other                                     | 1803                | 23.7  | 121                | 15.3 | 1682                      | 24.6  | 23.62              |

| Variable       | Level          | Overall<br>(N=7618) |       | Control<br>(N=792) |       | Dexamethasone<br>(N=6826) |       | Std Diff<br>Score* |
|----------------|----------------|---------------------|-------|--------------------|-------|---------------------------|-------|--------------------|
|                | Black          | 1143                | 15.0  | 135                | 17.0  | 1008                      | 14.8  |                    |
|                | White          | 4672                | 61.3  | 536                | 67.7  | 4136                      | 60.6  |                    |
| Hispanic       | Yes            | 1866                | 24.5  | 149                | 18.8  | 1717                      | 25.2  | 15.36              |
|                | No             | 5752                | 75.5  | 643                | 81.2  | 5109                      | 74.8  |                    |
| Smoking        | Current smoker | 401                 | 5.3   | 42                 | 5.3   | 359                       | 5.3   | 9.76               |
|                | Former smoker  | 1823                | 23.9  | 214                | 27.0  | 1609                      | 23.6  |                    |
|                | Never smoker   | 4114                | 54.0  | 395                | 49.9  | 3719                      | 54.5  |                    |
|                | Unknown        | 1280                | 16.8  | 141                | 17.8  | 1139                      | 16.7  |                    |
| BMI++ /ranks   | Median         | 6539                | 32.5  | 649                | 32.0  | 5890                      | 32.6  | 3.72               |
|                | 25th           |                     | 27.5  |                    | 26.9  |                           | 27.5  |                    |
|                | 75th           |                     | 38.9  |                    | 39.3  |                           | 38.8  |                    |
|                | Mean           |                     | 34.0  |                    | 33.8  |                           | 34.0  |                    |
|                | STD            |                     | 9.5   |                    | 10.2  |                           | 9.5   |                    |
|                | Min            |                     | 11.0  |                    | 13.7  |                           | 11.0  |                    |
|                | Max            |                     | 157.7 |                    | 152.6 |                           | 157.7 |                    |
|                | Missing(%)     |                     | 14.2  |                    | 18.1  |                           | 13.7  |                    |
| Hypertension   | Yes            | 6096                | 80.0  | 679                | 85.7  | 5417                      | 79.4  | 16.85              |
|                | No             | 1522                | 20.0  | 113                | 14.3  | 1409                      | 20.6  |                    |
| Hyperlipidemia | Yes            | 3956                | 51.9  | 490                | 61.9  | 3466                      | 50.8  | 22.51              |
|                | No             | 3662                | 48.1  | 302                | 38.1  | 3360                      | 49.2  |                    |
| CAD            | Yes            | 3013                | 39.6  | 358                | 45.2  | 2655                      | 38.9  | 12.80              |
|                | No             | 4605                | 60.4  | 434                | 54.8  | 4171                      | 61.1  |                    |
| MI             | Yes            | 1512                | 19.8  | 185                | 23.4  | 1327                      | 19.4  | 9.91               |
|                | No             | 5992                | 78.7  | 592                | 74.7  | 5400                      | 79.1  |                    |
|                | Missing        | 114                 | 1.5   | 15                 | 1.9   | 99                        | 1.5   |                    |

| Variable     | Level   | Overall<br>(N=7618) |      | Control<br>(N=792) |      | Dexamethasone<br>(N=6826) |      | Std Diff<br>Score* |
|--------------|---------|---------------------|------|--------------------|------|---------------------------|------|--------------------|
| Diabetes     | Yes     | 4335                | 56.9 | 480                | 60.6 | 3855                      | 56.5 | 8.39               |
|              | No      | 3283                | 43.1 | 312                | 39.4 | 2971                      | 43.5 |                    |
| Pre-Diabetes | Yes     | 129                 | 1.7  | 7                  | 0.9  | 122                       | 1.8  | 7.88               |
|              | No      | 7489                | 98.3 | 785                | 99.1 | 6704                      | 98.2 |                    |
| Obesity      | Yes     | 4458                | 58.5 | 471                | 59.5 | 3987                      | 58.4 | 2.16               |
|              | No      | 3160                | 41.5 | 321                | 40.5 | 2839                      | 41.6 |                    |
| Asthma       | Yes     | 729                 | 9.6  | 81                 | 10.2 | 648                       | 9.5  | 2.46               |
|              | No      | 6889                | 90.4 | 711                | 89.8 | 6178                      | 90.5 |                    |
| Autoimmune   | Yes     | 631                 | 8.3  | 85                 | 10.7 | 546                       | 8.0  | 9.39               |
|              | No      | 6987                | 91.7 | 707                | 89.3 | 6280                      | 92.0 |                    |
| COPD         | Yes     | 2700                | 35.4 | 339                | 42.8 | 2361                      | 34.6 | 16.93              |
|              | No      | 4918                | 64.6 | 453                | 57.2 | 4465                      | 65.4 |                    |
| Sarcoidosis  | Yes     | 14                  | 0.2  | 1                  | 0.1  | 13                        | 0.2  | 1.61               |
|              | No      | 7604                | 99.8 | 791                | 99.9 | 6813                      | 99.8 |                    |
| ILD          | Yes     | 37                  | 0.5  | 6                  | 0.8  | 31                        | 0.5  | 3.91               |
|              | No      | 7581                | 99.5 | 786                | 99.2 | 6795                      | 99.5 |                    |
| Stroke       | Yes     | 260                 | 3.4  | 33                 | 4.2  | 227                       | 3.3  | 4.56               |
|              | No      | 7244                | 95.1 | 744                | 93.9 | 6500                      | 95.2 |                    |
|              | Missing | 114                 | 1.5  | 15                 | 1.9  | 99                        | 1.5  |                    |
| PE           | Yes     | 388                 | 5.1  | 49                 | 6.2  | 339                       | 5.0  | 5.48               |
|              | No      | 7116                | 93.4 | 728                | 91.9 | 6388                      | 93.6 |                    |
|              | Missing | 114                 | 1.5  | 15                 | 1.9  | 99                        | 1.5  |                    |

| Variable                   | Level               | Overall<br>(N=7618) |       | Control<br>(N=792) |       | Dexamethasone<br>(N=6826) |       | Std Diff<br>Score* |
|----------------------------|---------------------|---------------------|-------|--------------------|-------|---------------------------|-------|--------------------|
| HIV/AIDS                   | Yes                 | 19                  | 0.2   | 2                  | 0.3   | 17                        | 0.2   | 0.07               |
|                            | No                  | 7599                | 99.8  | 790                | 99.7  | 6809                      | 99.8  |                    |
| Lymphoma/Leukemia          | Yes                 | 103                 | 1.4   | 13                 | 1.6   | 90                        | 1.3   | 2.67               |
|                            | No                  | 7515                | 98.6  | 779                | 98.4  | 6736                      | 98.7  |                    |
| Solid tumors               | Yes                 | 393                 | 5.2   | 51                 | 6.4   | 342                       | 5.0   | 6.15               |
|                            | No                  | 7225                | 94.8  | 741                | 93.6  | 6484                      | 95.0  |                    |
| CKD                        | Yes                 | 5627                | 73.9  | 597                | 75.4  | 5030                      | 73.7  | 3.88               |
|                            | No                  | 1991                | 26.1  | 195                | 24.6  | 1796                      | 26.3  |                    |
| Prior Dialysis             | Yes                 | 18                  | 0.2   | 3                  | 0.4   | 15                        | 0.2   | 2.91               |
|                            | No                  | 7600                | 99.8  | 789                | 99.6  | 6811                      | 99.8  |                    |
| Prior Revascularization    | Yes                 | 1040                | 13.7  | 144                | 18.2  | 896                       | 13.1  | 14.25              |
|                            | No                  | 6493                | 85.2  | 636                | 80.3  | 5857                      | 85.8  |                    |
|                            | Missing             | 85                  | 1.1   | 12                 | 1.5   | 73                        | 1.1   |                    |
| Charlson Comorbidity Index | 2: 2+ comorbidities | 4535                | 59.5  | 532                | 67.2  | 4003                      | 58.6  | 18.75              |
|                            | 1: 1 comorbidity    | 1777                | 23.3  | 147                | 18.6  | 1630                      | 23.9  |                    |
|                            | 0: 0 conditions     | 1192                | 15.6  | 98                 | 12.4  | 1094                      | 16.0  |                    |
|                            | Missing             | 114                 | 1.5   | 15                 | 1.9   | 99                        | 1.5   |                    |
| Baseline Spo2++ /ranks     | Median              | 7097                | 87.0  | 765                | 90.0  | 6332                      | 87.0  | 46.18              |
|                            | 25th                |                     | 80.0  |                    | 85.0  |                           | 80.0  |                    |
|                            | 75th                |                     | 92.0  |                    | 93.0  |                           | 91.0  |                    |
|                            | Mean                |                     | 85.0  |                    | 88.1  |                           | 84.6  |                    |
|                            | STD                 |                     | 8.8   |                    | 7.8   |                           | 8.8   |                    |
|                            | Min                 |                     | 60.0  |                    | 60.0  |                           | 60.0  |                    |
|                            | Max                 |                     | 100.0 |                    | 100.0 |                           | 100.0 |                    |

| Variable           | Level      | Overall<br>(N=7618) |       | Control<br>(N=792) |       | Dexamethasone<br>(N=6826) |       | Std Diff<br>Score* |
|--------------------|------------|---------------------|-------|--------------------|-------|---------------------------|-------|--------------------|
|                    | Missing(%) |                     | 6.8   |                    | 3.4   |                           | 7.2   |                    |
| Spo2++ /ranks      | Median     | 7121                | 87.0  | 772                | 89.0  | 6349                      | 86.0  | 44.18              |
|                    | 25th       |                     | 80.0  |                    | 86.0  |                           | 80.0  |                    |
|                    | 75th       |                     | 91.0  |                    | 92.0  |                           | 91.0  |                    |
|                    | Mean       |                     | 84.9  |                    | 87.9  |                           | 84.5  |                    |
|                    | STD        |                     | 8.3   |                    | 6.3   |                           | 8.5   |                    |
|                    | Min        |                     | 60.0  |                    | 60.0  |                           | 60.0  |                    |
|                    | Max        |                     | 100.0 |                    | 100.0 |                           | 100.0 |                    |
|                    | Missing(%) |                     | 6.5   |                    | 2.5   |                           | 7.0   |                    |
| FiO2++ /ranks      | Median     | 7490                | 100.0 | 781                | 98.0  | 6709                      | 100.0 | 28.92              |
|                    | 25th       |                     | 70.0  |                    | 50.0  |                           | 70.0  |                    |
|                    | 75th       |                     | 100.0 |                    | 100.0 |                           | 100.0 |                    |
|                    | Mean       |                     | 84.1  |                    | 76.8  |                           | 84.9  |                    |
|                    | STD        |                     | 23.2  |                    | 27.9  |                           | 22.5  |                    |
|                    | Min        |                     | 21.0  |                    | 21.0  |                           | 21.0  |                    |
|                    | Max        |                     | 100.0 |                    | 100.0 |                           | 100.0 |                    |
|                    | Missing(%) |                     | 1.7   |                    | 1.4   |                           | 1.7   |                    |
| S/F ratio++ /ranks | Median     | 6996                | 0.9   | 761                | 0.9   | 6235                      | 0.9   | 38.80              |
|                    | 25th       |                     | 0.8   |                    | 0.9   |                           | 0.8   |                    |
|                    | 75th       |                     | 1.3   |                    | 1.8   |                           | 1.3   |                    |
|                    | Mean       |                     | 1.2   |                    | 1.4   |                           | 1.1   |                    |
|                    | STD        |                     | 0.6   |                    | 0.9   |                           | 0.6   |                    |
|                    | Min        |                     | 0.6   |                    | 0.6   |                           | 0.6   |                    |
|                    | Max        |                     | 4.6   |                    | 4.6   |                           | 4.6   |                    |
|                    | Missing(%) |                     | 8.2   |                    | 3.9   |                           | 8.7   |                    |
| eGFR++ /ranks      | Median     | 6480                | 79.7  | 647                | 75.2  | 5833                      | 80.1  | 6.71               |
|                    | 25th       |                     | 47.2  |                    | 43.2  |                           | 47.7  |                    |
|                    | 75th       |                     | 120.0 |                    | 120.0 |                           | 120.0 |                    |

| Variable                         | Level      | Overall<br>(N=7618) |       | Control<br>(N=792) |       | Dexamethasone<br>(N=6826) |       | Std Diff<br>Score* |
|----------------------------------|------------|---------------------|-------|--------------------|-------|---------------------------|-------|--------------------|
|                                  | Mean       |                     | 77.5  |                    | 75.0  |                           | 77.8  |                    |
|                                  | STD        |                     | 36.1  |                    | 37.1  |                           | 35.9  |                    |
|                                  | Min        |                     | 2.1   |                    | 3.7   |                           | 2.1   |                    |
|                                  | Max        |                     | 120.0 |                    | 120.0 |                           | 120.0 |                    |
|                                  | Missing(%) |                     | 14.9  |                    | 18.3  |                           | 14.5  |                    |
| Time since admission++<br>/ranks | Median     | 7618                | 1.0   | 792                | 1.0   | 6826                      | 1.0   | 101.96             |
|                                  | 25th       |                     | 1.0   |                    | 1.0   |                           | 1.0   |                    |
|                                  | 75th       |                     | 1.0   |                    | 3.0   |                           | 1.0   |                    |
|                                  | Mean       |                     | 1.2   |                    | 2.3   |                           | 1.1   |                    |
|                                  | STD        |                     | 1.1   |                    | 2.5   |                           | 0.6   |                    |
|                                  | Min        |                     | 1.0   |                    | 1.0   |                           | 1.0   |                    |
|                                  | Max        |                     | 26.0  |                    | 26.0  |                           | 15.0  |                    |
|                                  | Missing(%) |                     | 0.0   |                    | 0.0   |                           | 0.0   |                    |
| ICU                              | Yes        | 3354                | 44.0  | 337                | 42.6  | 3017                      | 44.2  | 3.33               |
|                                  | No         | 4264                | 56.0  | 455                | 57.4  | 3809                      | 55.8  |                    |
| Anticoagulants<br>(prophylactic) | Yes        | 3043                | 39.9  | 402                | 50.8  | 2641                      | 38.7  | 24.45              |
|                                  | No         | 4575                | 60.1  | 390                | 49.2  | 4185                      | 61.3  |                    |
| Anticoagulants (treatment)       | Yes        | 1983                | 26.0  | 324                | 40.9  | 1659                      | 24.3  | 35.99              |
|                                  | No         | 5635                | 74.0  | 468                | 59.1  | 5167                      | 75.7  |                    |
| Remdesivir                       | Yes        | 2937                | 38.6  | 317                | 40.0  | 2620                      | 38.4  | 3.37               |
|                                  | No         | 4681                | 61.4  | 475                | 60.0  | 4206                      | 61.6  |                    |
| Vasopressors                     | Yes        | 75                  | 1.0   | 15                 | 1.9   | 60                        | 0.9   | 8.69               |
|                                  | No         | 7543                | 99.0  | 777                | 98.1  | 6766                      | 99.1  |                    |
| Tocilizumab                      | Yes        | 210                 | 2.8   | 30                 | 3.8   | 180                       | 2.6   | 6.53               |
|                                  | No         | 7408                | 97.2  | 762                | 96.2  | 6646                      | 97.4  |                    |



| Variable                | Level | Overall<br>(N=7618) |       | Control<br>(N=792) |       | Dexamethasone<br>(N=6826) |       | Std Diff<br>Score* |
|-------------------------|-------|---------------------|-------|--------------------|-------|---------------------------|-------|--------------------|
| Baricitinib             | Yes   | 147                 | 1.9   | 22                 | 2.8   | 125                       | 1.8   | 6.31               |
|                         | No    | 7471                | 98.1  | 770                | 97.2  | 6701                      | 98.2  |                    |
| Bamlanivimab/Etesevimab | No    | 7618                | 100.0 | 792                | 100.0 | 6826                      | 100.0 | .                  |
| Casirivimab/Imdevimab   | Yes   | 4                   | 0.1   | 1                  | 0.1   | 3                         | 0.0   | 2.82               |
|                         | No    | 7614                | 99.9  | 791                | 99.9  | 6823                      | 100.0 |                    |
| Azithromycin            | Yes   | 4969                | 65.2  | 450                | 56.8  | 4519                      | 66.2  | 19.38              |
|                         | No    | 2649                | 34.8  | 342                | 43.2  | 2307                      | 33.8  |                    |
| Antibiotics             | Yes   | 6688                | 87.8  | 666                | 84.1  | 6022                      | 88.2  | 11.98              |
|                         | No    | 930                 | 12.2  | 126                | 15.9  | 804                       | 11.8  |                    |

\* Standardized difference scores measure the effect size between Control and Dexamethasone (All Standardized difference scores have been multiplied by 100).

++ /ranks indicates standardized difference score was calculated using rank statistics for the row variable.

**eTable 4.** Characteristics of Patients Eligible for the Mechanical Ventilation (MV) or Extracorporeal Membrane Oxygenation (ECMO) Cohort

| Variable                              | Level      | Overall<br>(N=3673) |       | Control<br>(N=1013) |       | Dexamethasone<br>(N=2660) |       | Std Diff<br>Score* |
|---------------------------------------|------------|---------------------|-------|---------------------|-------|---------------------------|-------|--------------------|
| <b><u>Demographics</u></b>            |            |                     |       |                     |       |                           |       |                    |
| Hospital COVID<br>Prevalence++ /ranks | Median     | 3673                | 0.1   | 1013                | 0.1   | 2660                      | 0.1   | 7.43               |
|                                       | 25th       |                     | 0.1   |                     | 0.1   |                           | 0.1   |                    |
|                                       | 75th       |                     | 0.2   |                     | 0.2   |                           | 0.2   |                    |
|                                       | Mean       |                     | 0.1   |                     | 0.1   |                           | 0.1   |                    |
|                                       | STD        |                     | 0.1   |                     | 0.1   |                           | 0.1   |                    |
|                                       | Min        |                     | 0.0   |                     | 0.0   |                           | 0.0   |                    |
|                                       | Max        |                     | 0.7   |                     | 0.6   |                           | 0.7   |                    |
|                                       | Missing(%) |                     | 0.0   |                     | 0.0   |                           | 0.0   |                    |
| Number of Total Beds++<br>/ranks      | Median     | 3673                | 346.0 | 1013                | 347.0 | 2660                      | 346.0 | 1.74               |
|                                       | 25th       |                     | 255.0 |                     | 250.0 |                           | 256.0 |                    |
|                                       | 75th       |                     | 471.0 |                     | 482.0 |                           | 470.0 |                    |
|                                       | Mean       |                     | 378.3 |                     | 375.0 |                           | 379.5 |                    |
|                                       | STD        |                     | 182.8 |                     | 181.7 |                           | 183.2 |                    |
|                                       | Min        |                     | 51.0  |                     | 61.0  |                           | 51.0  |                    |
|                                       | Max        |                     | 899.0 |                     | 899.0 |                           | 899.0 |                    |
|                                       | Missing(%) |                     | 0.0   |                     | 0.0   |                           | 0.0   |                    |
| Number of ICU Beds++<br>/ranks        | Median     | 3673                | 39.0  | 1013                | 40.0  | 2660                      | 38.0  | 1.13               |
|                                       | 25th       |                     | 24.0  |                     | 24.0  |                           | 24.0  |                    |
|                                       | 75th       |                     | 56.0  |                     | 54.0  |                           | 56.0  |                    |
|                                       | Mean       |                     | 45.3  |                     | 45.1  |                           | 45.4  |                    |
|                                       | STD        |                     | 28.6  |                     | 28.0  |                           | 28.8  |                    |
|                                       | Min        |                     | 4.0   |                     | 4.0   |                           | 4.0   |                    |
|                                       | Max        |                     | 139.0 |                     | 139.0 |                           | 139.0 |                    |
|                                       | Missing(%) |                     | 0.0   |                     | 0.0   |                           | 0.0   |                    |
| Region                                | West       | 655                 | 17.8  | 102                 | 10.1  | 553                       | 20.8  | 35.75              |

| Variable                             | Level                                     | Overall<br>(N=3673) |      | Control<br>(N=1013) |      | Dexamethasone<br>(N=2660) |      | Std Diff<br>Score* |
|--------------------------------------|-------------------------------------------|---------------------|------|---------------------|------|---------------------------|------|--------------------|
|                                      | South                                     | 2875                | 78.3 | 837                 | 82.6 | 2038                      | 76.6 |                    |
|                                      | Midwest                                   | 143                 | 3.9  | 74                  | 7.3  | 69                        | 2.6  |                    |
| Calendar Epoch Intervals++<br>/ranks | Epoch 10: Q4 2021                         | 86                  | 2.3  | 35                  | 3.5  | 51                        | 1.9  | 7.38               |
|                                      | Epoch 9: Q3 2021                          | 929                 | 25.3 | 269                 | 26.6 | 660                       | 24.8 |                    |
|                                      | Epoch 8: Q2 2021                          | 248                 | 6.8  | 82                  | 8.1  | 166                       | 6.2  |                    |
|                                      | Epoch 7: Q1 2021                          | 747                 | 20.3 | 198                 | 19.5 | 549                       | 20.6 |                    |
|                                      | Epoch 6: August 24 -<br>December 31, 2020 | 1052                | 28.6 | 249                 | 24.6 | 803                       | 30.2 |                    |
|                                      | Epoch 5: July 6 - August<br>23, 2020      | 560                 | 15.2 | 167                 | 16.5 | 393                       | 14.8 |                    |
|                                      | Epoch 4: May 20 - July 5,<br>2020         | 51                  | 1.4  | 13                  | 1.3  | 38                        | 1.4  |                    |
| Age++ /ranks                         | Median                                    | 3673                | 63.0 | 1013                | 64.0 | 2660                      | 63.0 | 2.52               |
|                                      | 25th                                      |                     | 52.0 |                     | 50.0 |                           | 53.0 |                    |
|                                      | 75th                                      |                     | 74.0 |                     | 74.0 |                           | 73.0 |                    |
|                                      | Mean                                      |                     | 61.8 |                     | 61.2 |                           | 62.0 |                    |
|                                      | STD                                       |                     | 16.0 |                     | 17.2 |                           | 15.5 |                    |
|                                      | Min                                       |                     | 18.0 |                     | 18.0 |                           | 19.0 |                    |
|                                      | Max                                       |                     | 98.0 |                     | 97.0 |                           | 98.0 |                    |
|                                      | Missing(%)                                |                     | 0.0  |                     | 0.0  |                           | 0.0  |                    |
| Age group++ /ranks                   | 3: 70+                                    | 1175                | 32.0 | 336                 | 33.2 | 839                       | 31.5 | 2.73               |
|                                      | 2: 51-70                                  | 1644                | 44.8 | 412                 | 40.7 | 1232                      | 46.3 |                    |
|                                      | 1: 18-50                                  | 854                 | 23.3 | 265                 | 26.2 | 589                       | 22.1 |                    |
| Female                               | Yes                                       | 1495                | 40.7 | 420                 | 41.5 | 1075                      | 40.4 | 2.13               |
|                                      | No                                        | 2178                | 59.3 | 593                 | 58.5 | 1585                      | 59.6 |                    |
| Race                                 | Other                                     | 1033                | 28.1 | 222                 | 21.9 | 811                       | 30.5 | 19.61              |
|                                      | Black                                     | 576                 | 15.7 | 175                 | 17.3 | 401                       | 15.1 |                    |

| Variable       | Level          | Overall<br>(N=3673) |      | Control<br>(N=1013) |      | Dexamethasone<br>(N=2660) |      | Std Diff<br>Score* |
|----------------|----------------|---------------------|------|---------------------|------|---------------------------|------|--------------------|
|                | White          | 2064                | 56.2 | 616                 | 60.8 | 1448                      | 54.4 |                    |
| Hispanic       | Yes            | 952                 | 25.9 | 247                 | 24.4 | 705                       | 26.5 | 4.87               |
|                | No             | 2721                | 74.1 | 766                 | 75.6 | 1955                      | 73.5 |                    |
| Smoking        | Current smoker | 267                 | 7.3  | 95                  | 9.4  | 172                       | 6.5  | 16.43              |
|                | Former smoker  | 521                 | 14.2 | 168                 | 16.6 | 353                       | 13.3 |                    |
|                | Never smoker   | 1303                | 35.5 | 358                 | 35.3 | 945                       | 35.5 |                    |
|                | Unknown        | 1582                | 43.1 | 392                 | 38.7 | 1190                      | 44.7 |                    |
| BMI++ /ranks   | Median         | 3105                | 30.0 | 844                 | 29.6 | 2261                      | 30.2 | 9.62               |
|                | 25th           |                     | 25.7 |                     | 25.3 |                           | 25.8 |                    |
|                | 75th           |                     | 36.0 |                     | 34.9 |                           | 36.5 |                    |
|                | Mean           |                     | 31.6 |                     | 30.9 |                           | 31.8 |                    |
|                | STD            |                     | 8.7  |                     | 8.3  |                           | 8.8  |                    |
|                | Min            |                     | 9.7  |                     | 14.4 |                           | 9.7  |                    |
|                | Max            |                     | 68.1 |                     | 68.1 |                           | 66.0 |                    |
|                | Missing(%)     |                     | 15.5 |                     | 16.7 |                           | 15.0 |                    |
| Hypertension   | Yes            | 2838                | 77.3 | 789                 | 77.9 | 2049                      | 77.0 | 2.05               |
|                | No             | 835                 | 22.7 | 224                 | 22.1 | 611                       | 23.0 |                    |
| Hyperlipidemia | Yes            | 1755                | 47.8 | 493                 | 48.7 | 1262                      | 47.4 | 2.45               |
|                | No             | 1918                | 52.2 | 520                 | 51.3 | 1398                      | 52.6 |                    |
| CAD            | Yes            | 1607                | 43.8 | 429                 | 42.3 | 1178                      | 44.3 | 3.91               |
|                | No             | 2066                | 56.2 | 584                 | 57.7 | 1482                      | 55.7 |                    |
| MI             | Yes            | 947                 | 25.8 | 221                 | 21.8 | 726                       | 27.3 | 12.96              |
|                | No             | 2678                | 72.9 | 780                 | 77.0 | 1898                      | 71.4 |                    |
|                | Missing        | 48                  | 1.3  | 12                  | 1.2  | 36                        | 1.4  |                    |

| Variable     | Level   | Overall<br>(N=3673) |      | Control<br>(N=1013) |      | Dexamethasone<br>(N=2660) |      | Std Diff<br>Score* |
|--------------|---------|---------------------|------|---------------------|------|---------------------------|------|--------------------|
| Diabetes     | Yes     | 2101                | 57.2 | 537                 | 53.0 | 1564                      | 58.8 | 11.67              |
|              | No      | 1572                | 42.8 | 476                 | 47.0 | 1096                      | 41.2 |                    |
| Pre-Diabetes | Yes     | 39                  | 1.1  | 11                  | 1.1  | 28                        | 1.1  | 0.32               |
|              | No      | 3634                | 98.9 | 1002                | 98.9 | 2632                      | 98.9 |                    |
| Obesity      | Yes     | 1761                | 47.9 | 440                 | 43.4 | 1321                      | 49.7 | 12.51              |
|              | No      | 1912                | 52.1 | 573                 | 56.6 | 1339                      | 50.3 |                    |
| Asthma       | Yes     | 294                 | 8.0  | 76                  | 7.5  | 218                       | 8.2  | 2.58               |
|              | No      | 3379                | 92.0 | 937                 | 92.5 | 2442                      | 91.8 |                    |
| Autoimmune   | Yes     | 305                 | 8.3  | 105                 | 10.4 | 200                       | 7.5  | 9.99               |
|              | No      | 3368                | 91.7 | 908                 | 89.6 | 2460                      | 92.5 |                    |
| COPD         | Yes     | 1111                | 30.2 | 310                 | 30.6 | 801                       | 30.1 | 1.06               |
|              | No      | 2562                | 69.8 | 703                 | 69.4 | 1859                      | 69.9 |                    |
| Sarcoidosis  | Yes     | 3                   | 0.1  | 1                   | 0.1  | 2                         | 0.1  | 0.80               |
|              | No      | 3670                | 99.9 | 1012                | 99.9 | 2658                      | 99.9 |                    |
| ILD          | Yes     | 23                  | 0.6  | 4                   | 0.4  | 19                        | 0.7  | 4.30               |
|              | No      | 3650                | 99.4 | 1009                | 99.6 | 2641                      | 99.3 |                    |
| Stroke       | Yes     | 279                 | 7.6  | 89                  | 8.8  | 190                       | 7.1  | 6.06               |
|              | No      | 3346                | 91.1 | 912                 | 90.0 | 2434                      | 91.5 |                    |
|              | Missing | 48                  | 1.3  | 12                  | 1.2  | 36                        | 1.4  |                    |
| PE           | Yes     | 195                 | 5.3  | 47                  | 4.6  | 148                       | 5.6  | 4.27               |
|              | No      | 3430                | 93.4 | 954                 | 94.2 | 2476                      | 93.1 |                    |
|              | Missing | 48                  | 1.3  | 12                  | 1.2  | 36                        | 1.4  |                    |

| Variable                   | Level               | Overall<br>(N=3673) |       | Control<br>(N=1013) |       | Dexamethasone<br>(N=2660) |       | Std Diff<br>Score* |
|----------------------------|---------------------|---------------------|-------|---------------------|-------|---------------------------|-------|--------------------|
| HIV/AIDS                   | Yes                 | 19                  | 0.5   | 5                   | 0.5   | 14                        | 0.5   | 0.46               |
|                            | No                  | 3654                | 99.5  | 1008                | 99.5  | 2646                      | 99.5  |                    |
| Lymphoma/Leukemia          | Yes                 | 46                  | 1.3   | 14                  | 1.4   | 32                        | 1.2   | 1.59               |
|                            | No                  | 3627                | 98.7  | 999                 | 98.6  | 2628                      | 98.8  |                    |
| Solid tumors               | Yes                 | 198                 | 5.4   | 56                  | 5.5   | 142                       | 5.3   | 0.84               |
|                            | No                  | 3475                | 94.6  | 957                 | 94.5  | 2518                      | 94.7  |                    |
| CKD                        | Yes                 | 2964                | 80.7  | 774                 | 76.4  | 2190                      | 82.3  | 14.68              |
|                            | No                  | 709                 | 19.3  | 239                 | 23.6  | 470                       | 17.7  |                    |
| Prior Dialysis             | Yes                 | 12                  | 0.3   | 7                   | 0.7   | 5                         | 0.2   | 7.61               |
|                            | No                  | 3661                | 99.7  | 1006                | 99.3  | 2655                      | 99.8  |                    |
| Prior Revascularization    | Yes                 | 434                 | 11.8  | 131                 | 12.9  | 303                       | 11.4  | 4.76               |
|                            | No                  | 3200                | 87.1  | 871                 | 86.0  | 2329                      | 87.6  |                    |
|                            | Missing             | 39                  | 1.1   | 11                  | 1.1   | 28                        | 1.1   |                    |
| Charlson Comorbidity Index | 2: 2+ comorbidities | 2429                | 66.1  | 658                 | 65.0  | 1771                      | 66.6  | 11.15              |
|                            | 1: 1 comorbidity    | 769                 | 20.9  | 199                 | 19.6  | 570                       | 21.4  |                    |
|                            | 0: 0 conditions     | 427                 | 11.6  | 144                 | 14.2  | 283                       | 10.6  |                    |
|                            | Missing             | 48                  | 1.3   | 12                  | 1.2   | 36                        | 1.4   |                    |
| Baseline Spo2++ /ranks     | Median              | 3348                | 89.0  | 967                 | 92.0  | 2381                      | 88.0  | 53.85              |
|                            | 25th                |                     | 80.0  |                     | 86.0  |                           | 79.0  |                    |
|                            | 75th                |                     | 94.0  |                     | 96.0  |                           | 92.0  |                    |
|                            | Mean                |                     | 86.4  |                     | 89.6  |                           | 85.1  |                    |
|                            | STD                 |                     | 9.6   |                     | 8.4   |                           | 9.7   |                    |
|                            | Min                 |                     | 60.0  |                     | 60.0  |                           | 60.0  |                    |
|                            | Max                 |                     | 100.0 |                     | 100.0 |                           | 100.0 |                    |
|                            | Missing(%)          |                     | 8.8   |                     | 4.5   |                           | 10.5  |                    |

| Variable           | Level      | Overall<br>(N=3673) |       | Control<br>(N=1013) |       | Dexamethasone<br>(N=2660) |       | Std Diff<br>Score* |
|--------------------|------------|---------------------|-------|---------------------|-------|---------------------------|-------|--------------------|
| Spo2++ /ranks      | Median     | 3368                | 88.0  | 975                 | 91.0  | 2393                      | 87.0  | 62.26              |
|                    | 25th       |                     | 80.0  |                     | 87.0  |                           | 79.0  |                    |
|                    | 75th       |                     | 93.0  |                     | 95.0  |                           | 92.0  |                    |
|                    | Mean       |                     | 86.1  |                     | 89.8  |                           | 84.6  |                    |
|                    | STD        |                     | 9.3   |                     | 7.5   |                           | 9.6   |                    |
|                    | Min        |                     | 60.0  |                     | 60.0  |                           | 60.0  |                    |
|                    | Max        |                     | 100.0 |                     | 100.0 |                           | 100.0 |                    |
|                    | Missing(%) |                     | 8.3   |                     | 3.8   |                           | 10.0  |                    |
| FiO2++ /ranks      | Median     | 3670                | 100.0 | 1013                | 80.0  | 2657                      | 100.0 | 88.57              |
|                    | 25th       |                     | 70.0  |                     | 50.0  |                           | 100.0 |                    |
|                    | 75th       |                     | 100.0 |                     | 100.0 |                           | 100.0 |                    |
|                    | Mean       |                     | 86.5  |                     | 73.2  |                           | 91.5  |                    |
|                    | STD        |                     | 21.7  |                     | 25.6  |                           | 17.5  |                    |
|                    | Min        |                     | 21.0  |                     | 21.0  |                           | 28.0  |                    |
|                    | Max        |                     | 100.0 |                     | 100.0 |                           | 100.0 |                    |
|                    | Missing(%) |                     | 0.1   |                     | 0.0   |                           | 0.1   |                    |
| S/F ratio++ /ranks | Median     | 3365                | 0.9   | 975                 | 1.2   | 2390                      | 0.9   | 90.63              |
|                    | 25th       |                     | 0.8   |                     | 0.9   |                           | 0.8   |                    |
|                    | 75th       |                     | 1.3   |                     | 1.9   |                           | 1.0   |                    |
|                    | Mean       |                     | 1.1   |                     | 1.4   |                           | 1.0   |                    |
|                    | STD        |                     | 0.5   |                     | 0.7   |                           | 0.4   |                    |
|                    | Min        |                     | 0.6   |                     | 0.6   |                           | 0.6   |                    |
|                    | Max        |                     | 4.6   |                     | 4.6   |                           | 3.4   |                    |
|                    | Missing(%) |                     | 8.4   |                     | 3.8   |                           | 10.2  |                    |
| eGFR++ /ranks      | Median     | 3103                | 64.0  | 843                 | 65.6  | 2260                      | 63.6  | 4.88               |
|                    | 25th       |                     | 35.5  |                     | 35.2  |                           | 35.6  |                    |
|                    | 75th       |                     | 105.6 |                     | 111.2 |                           | 103.5 |                    |
|                    | Mean       |                     | 67.9  |                     | 69.3  |                           | 67.4  |                    |

| Variable                         | Level      | Overall<br>(N=3673) |       | Control<br>(N=1013) |       | Dexamethasone<br>(N=2660) |       | Std Diff<br>Score* |
|----------------------------------|------------|---------------------|-------|---------------------|-------|---------------------------|-------|--------------------|
|                                  | STD        |                     | 37.3  |                     | 38.3  |                           | 36.9  |                    |
|                                  | Min        |                     | 3.6   |                     | 4.7   |                           | 3.6   |                    |
|                                  | Max        |                     | 120.0 |                     | 120.0 |                           | 120.0 |                    |
|                                  | Missing(%) |                     | 15.5  |                     | 16.8  |                           | 15.0  |                    |
| Time since admission++<br>/ranks | Median     | 3673                | 1.0   | 1013                | 1.0   | 2660                      | 1.0   | 72.93              |
|                                  | 25th       |                     | 1.0   |                     | 1.0   |                           | 1.0   |                    |
|                                  | 75th       |                     | 1.0   |                     | 3.0   |                           | 1.0   |                    |
|                                  | Mean       |                     | 1.5   |                     | 2.3   |                           | 1.2   |                    |
|                                  | STD        |                     | 1.7   |                     | 2.7   |                           | 1.0   |                    |
|                                  | Min        |                     | 1.0   |                     | 1.0   |                           | 1.0   |                    |
|                                  | Max        |                     | 20.0  |                     | 20.0  |                           | 18.0  |                    |
|                                  | Missing(%) |                     | 0.0   |                     | 0.0   |                           | 0.0   |                    |
| ICU                              | Yes        | 3436                | 93.5  | 981                 | 96.8  | 2455                      | 92.3  | 20.17              |
|                                  | No         | 237                 | 6.5   | 32                  | 3.2   | 205                       | 7.7   |                    |
| Anticoagulants<br>(prophylactic) | Yes        | 1590                | 43.3  | 451                 | 44.5  | 1139                      | 42.8  | 3.43               |
|                                  | No         | 2083                | 56.7  | 562                 | 55.5  | 1521                      | 57.2  |                    |
| Anticoagulants (treatment)       | Yes        | 1087                | 29.6  | 338                 | 33.4  | 749                       | 28.2  | 11.30              |
|                                  | No         | 2586                | 70.4  | 675                 | 66.6  | 1911                      | 71.8  |                    |
| Remdesivir                       | Yes        | 1032                | 28.1  | 208                 | 20.5  | 824                       | 31.0  | 24.06              |
|                                  | No         | 2641                | 71.9  | 805                 | 79.5  | 1836                      | 69.0  |                    |
| Vasopressors                     | Yes        | 793                 | 21.6  | 263                 | 26.0  | 530                       | 19.9  | 14.40              |
|                                  | No         | 2880                | 78.4  | 750                 | 74.0  | 2130                      | 80.1  |                    |
| Tocilizumab                      | Yes        | 127                 | 3.5   | 26                  | 2.6   | 101                       | 3.8   | 7.01               |
|                                  | No         | 3546                | 96.5  | 987                 | 97.4  | 2559                      | 96.2  |                    |



| Variable                | Level | Overall<br>(N=3673) |       | Control<br>(N=1013) |       | Dexamethasone<br>(N=2660) |       | Std Diff<br>Score* |
|-------------------------|-------|---------------------|-------|---------------------|-------|---------------------------|-------|--------------------|
| Baricitinib             | Yes   | 52                  | 1.4   | 21                  | 2.1   | 31                        | 1.2   | 7.20               |
|                         | No    | 3621                | 98.6  | 992                 | 97.9  | 2629                      | 98.8  |                    |
| Bamlanivimab/Etesevimab | No    | 3673                | 100.0 | 1013                | 100.0 | 2660                      | 100.0 | .                  |
| Casirivimab/Imdevimab   | No    | 3673                | 100.0 | 1013                | 100.0 | 2660                      | 100.0 | .                  |
| Azithromycin            | Yes   | 1681                | 45.8  | 334                 | 33.0  | 1347                      | 50.6  | 36.41              |
|                         | No    | 1992                | 54.2  | 679                 | 67.0  | 1313                      | 49.4  |                    |
| Antibiotics             | Yes   | 3162                | 86.1  | 847                 | 83.6  | 2315                      | 87.0  | 9.67               |
|                         | No    | 511                 | 13.9  | 166                 | 16.4  | 345                       | 13.0  |                    |

\* Standardized difference scores measure the effect size between Control and Dexamethasone (All Standardized difference scores have been multiplied by 100).

++ /ranks indicates standardized difference score was calculated using rank statistics for the row variable.

**eFigure 5.** Unadjusted Connect-S Plot for No Supplemental Oxygen Cohort

ASMD <0.10 is very good balance and <0.20 is adequate. Subgroups with ASMD > 0.20 should be interpreted with caution.

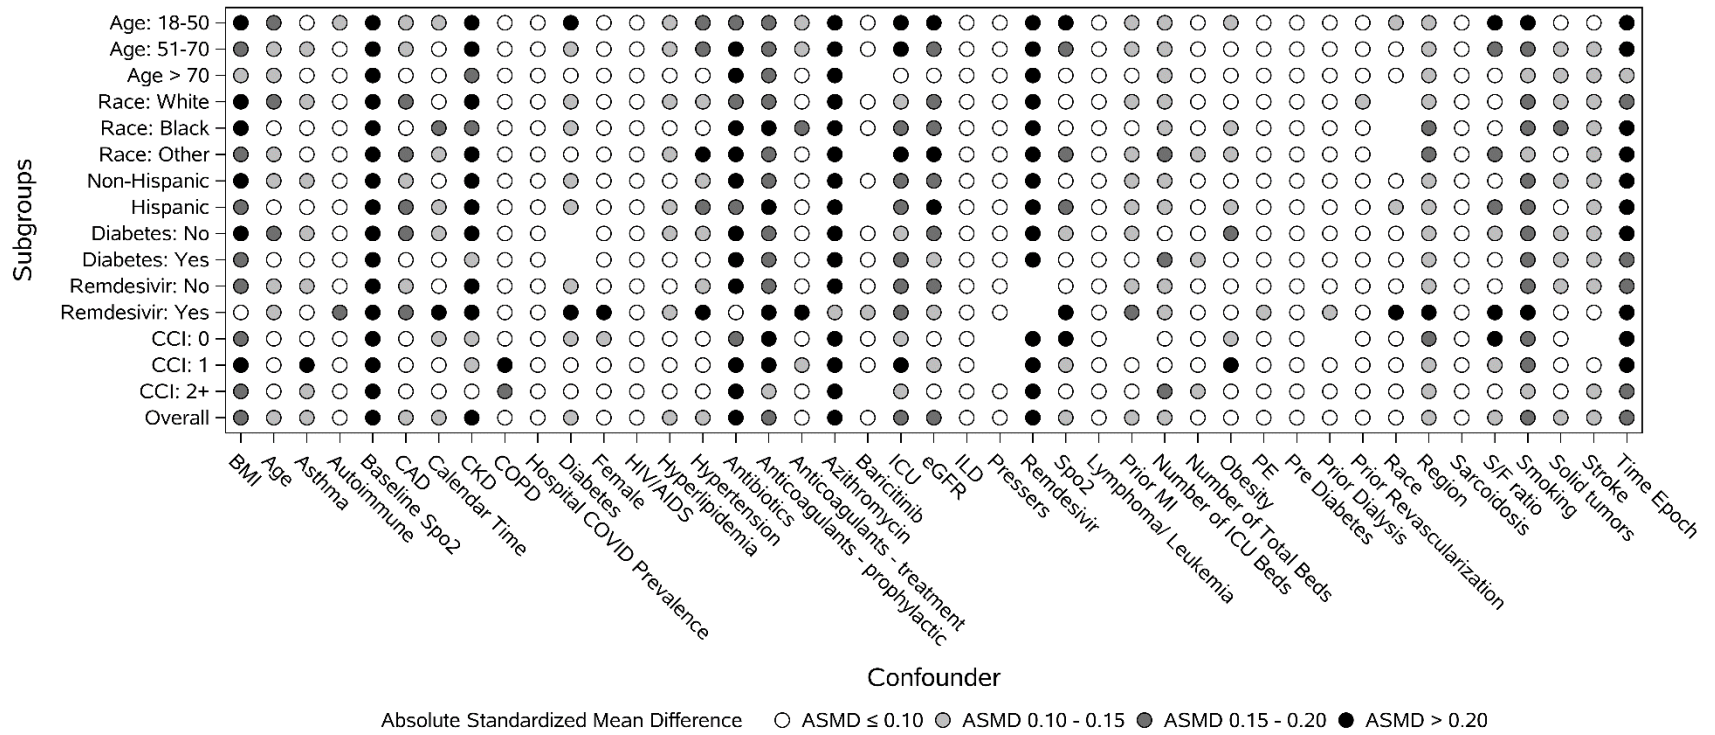

**eFigure 6.** IPW-Logistic Connect-S Plot for No Supplemental Oxygen Cohort

After adjustment by inverse probability of treatment weighting with logistic regression estimation of the propensity score model (Standard method).

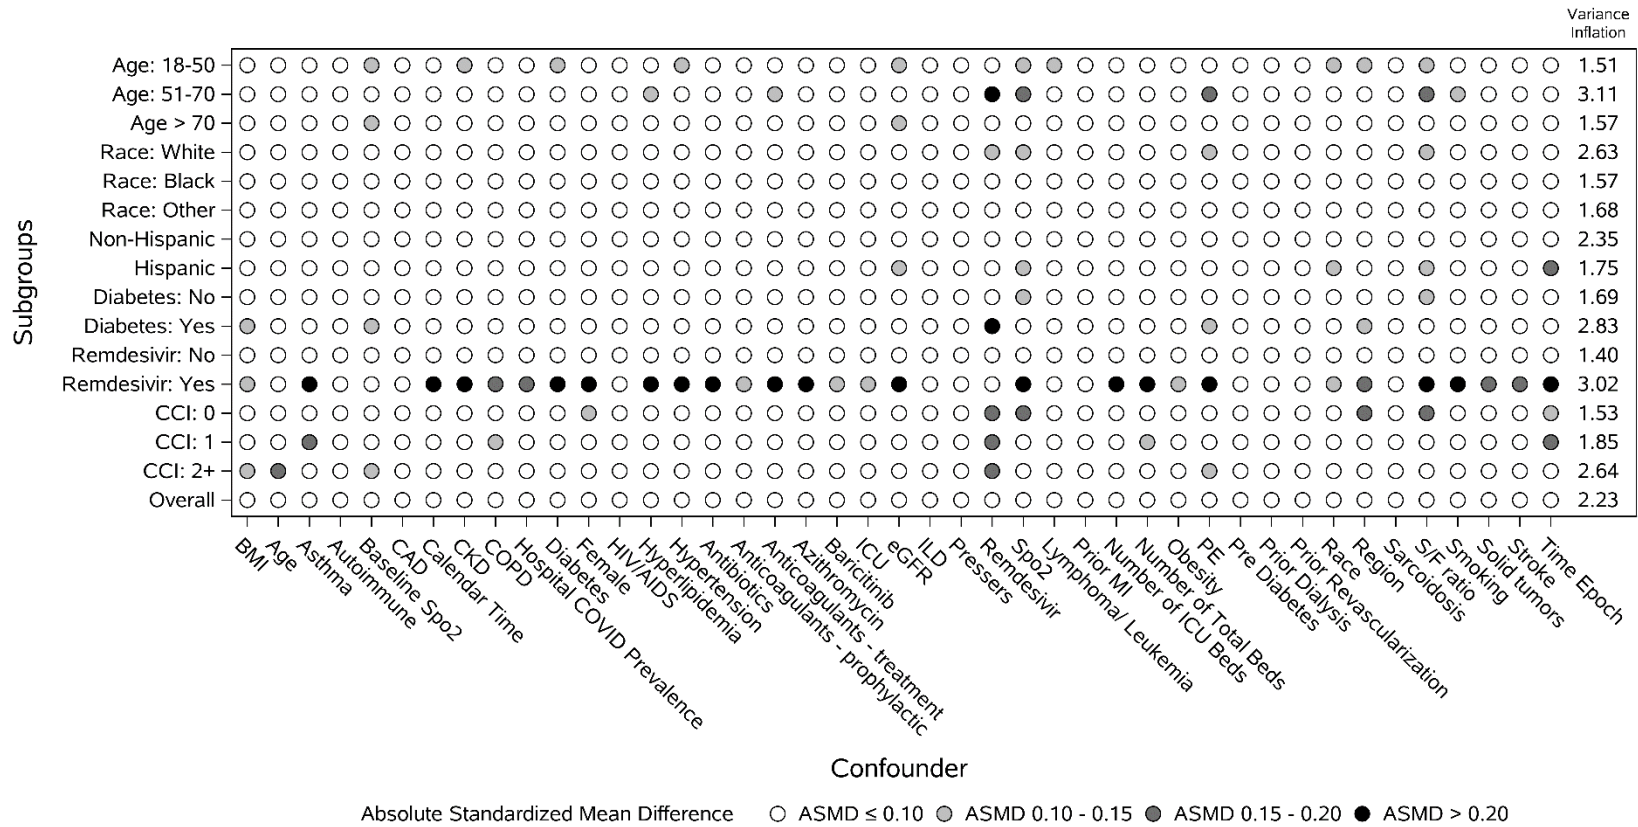



**eFigure 8.** Unadjusted Connect-S Plot for Supplemental Oxygen Cohort

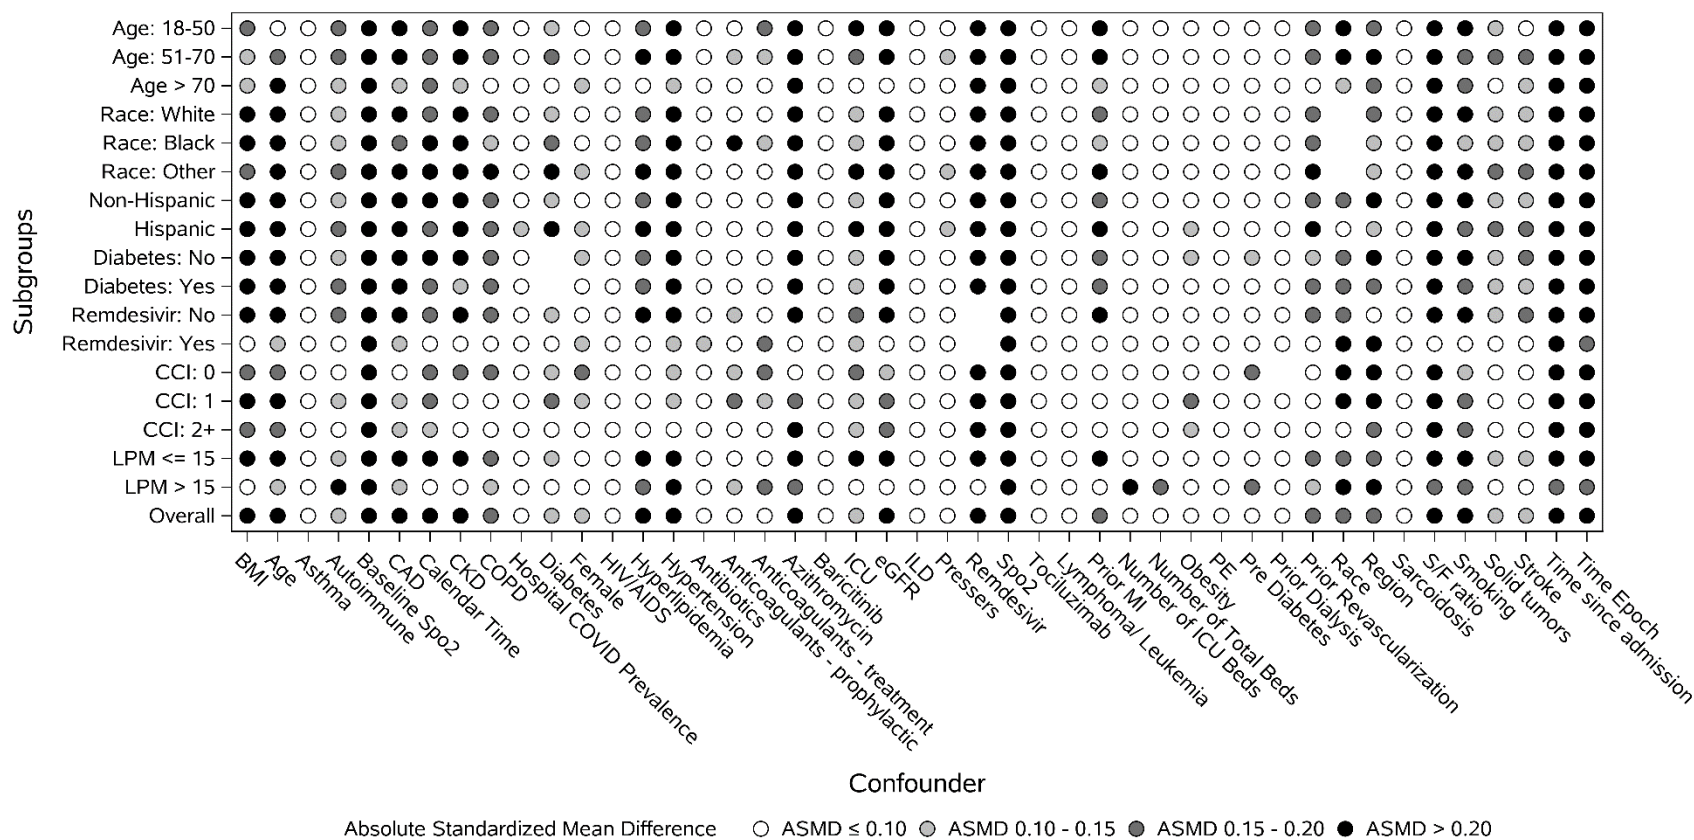

**eFigure 9.** IPW-Logistic Connect-S Plot for Supplemental Oxygen Cohort

After adjustment by inverse probability of treatment weighting with logistic regression estimation of the propensity score model (Standard method).

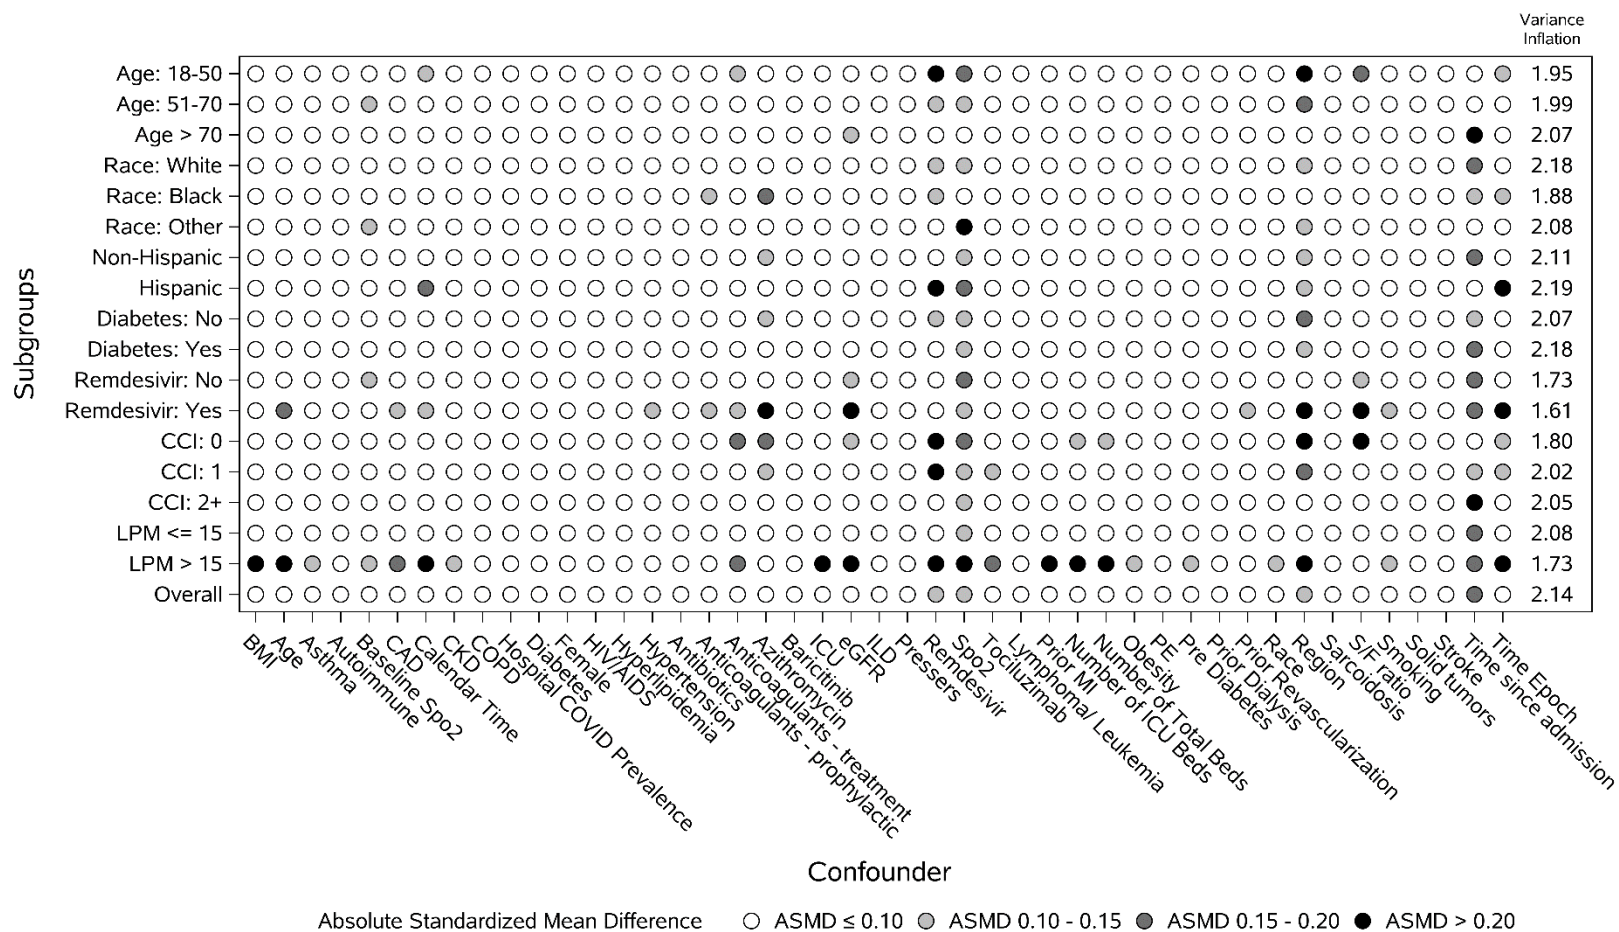

**eFigure 10.** OW Adjusted Connect-S Plot for Supplemental Oxygen Cohort

After adjustment by overlap probability of treatment weighting with LASSO estimation of the propensity score model (improved method).

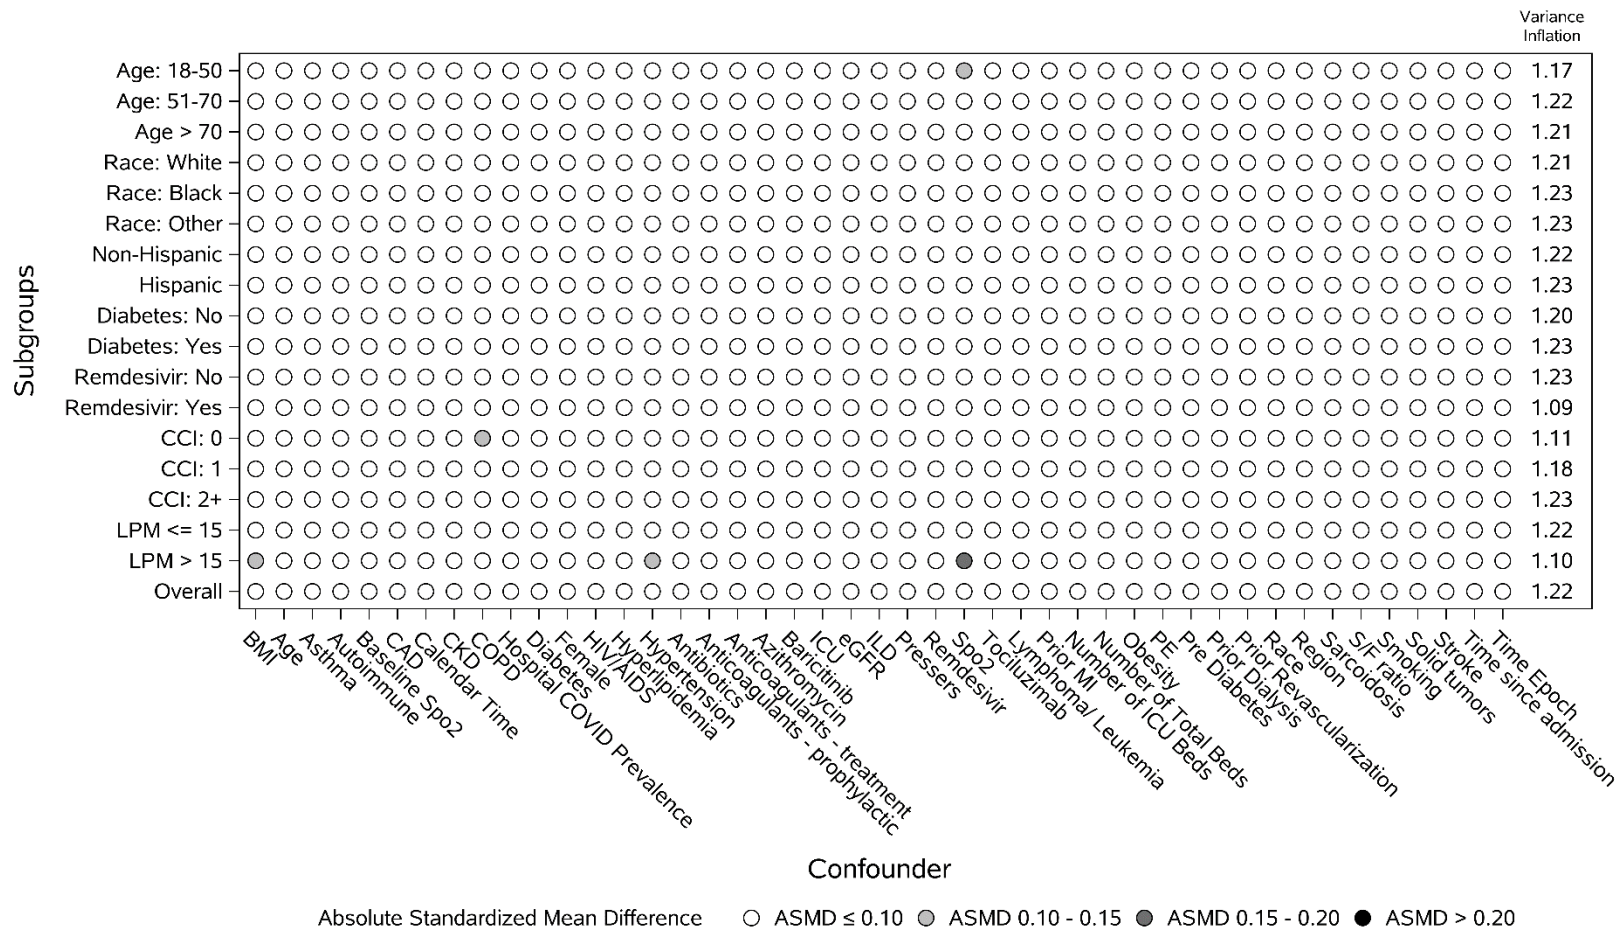





**eFigure 12.** IPW-Logistic Connect-S Plot for NIPPV Cohort

After adjustment by inverse probability of treatment weighting with logistic regression estimation of the propensity score model (Standard method).

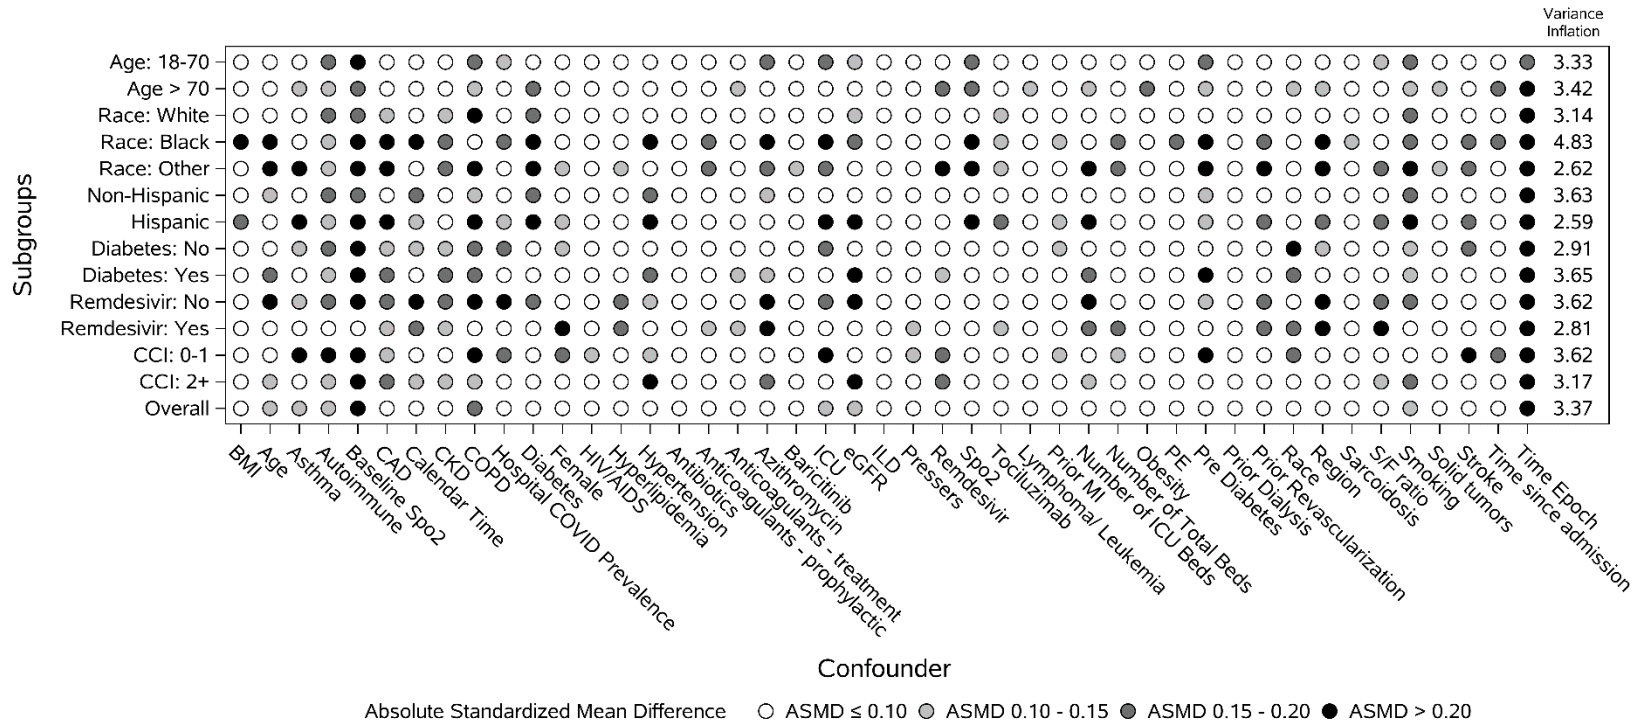



**eFigure 14.** Unadjusted Connect-S Plot for MV or ECMO Cohort

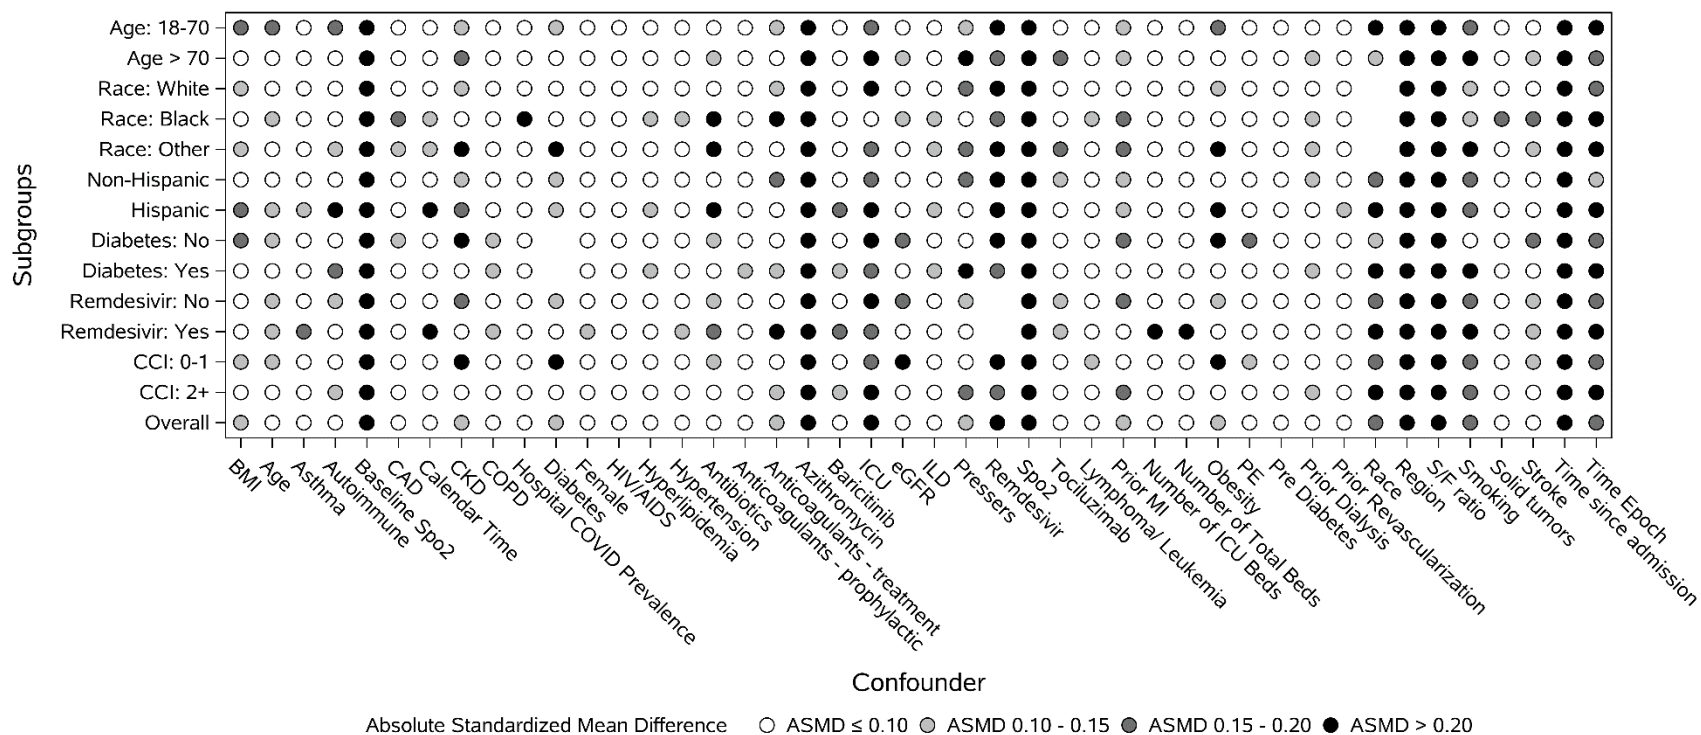



**eFigure 16.** OW Adjusted Connect-S Plot for MV or ECMO Cohort

After adjustment by overlap probability of treatment weighting with LASSO estimation of the propensity score model (improved method).

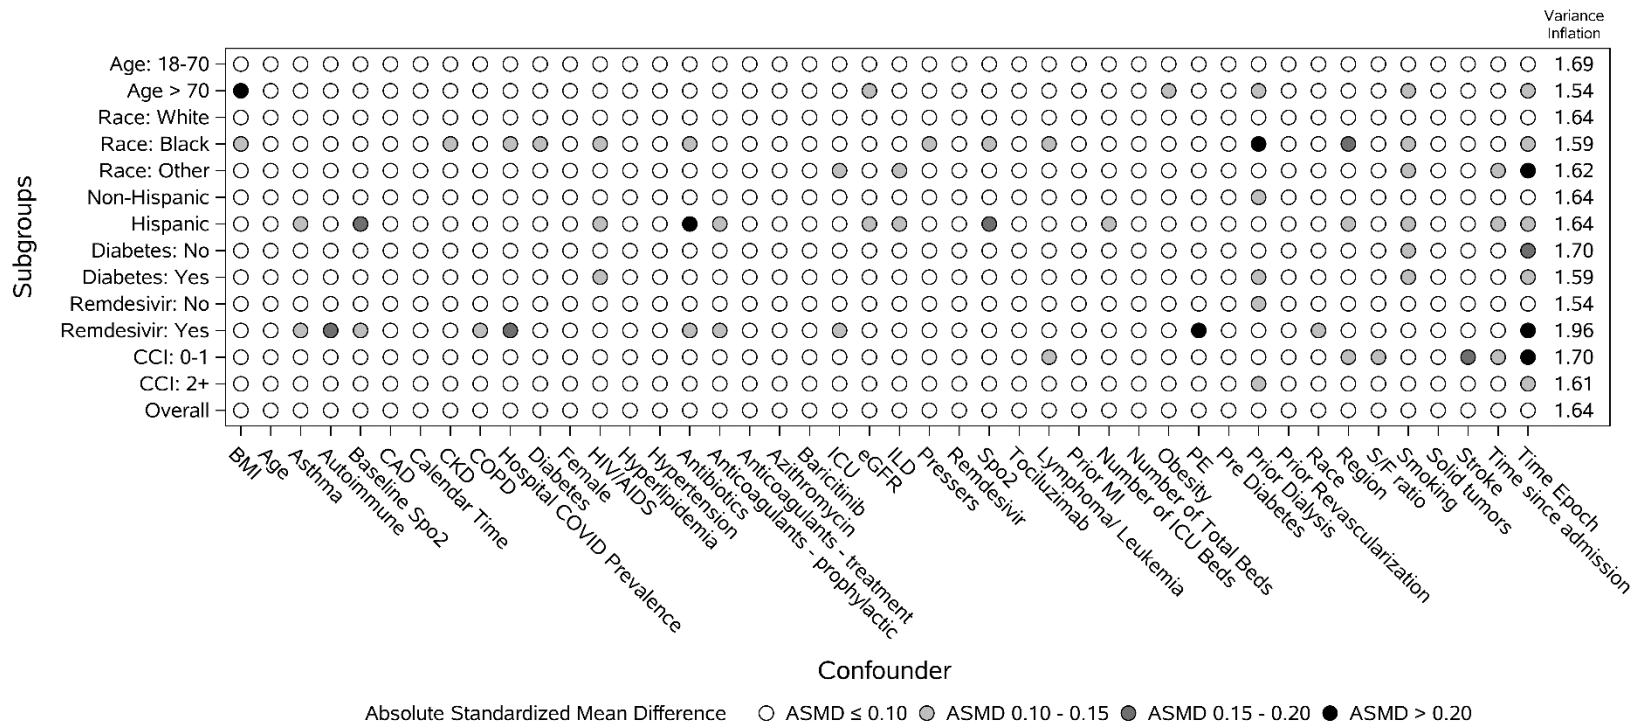

**eFigure 17.** Histogram of the Propensity Score Distribution Overlaid by Treatment After Overlap Weighting for No Supplemental Oxygen Cohort

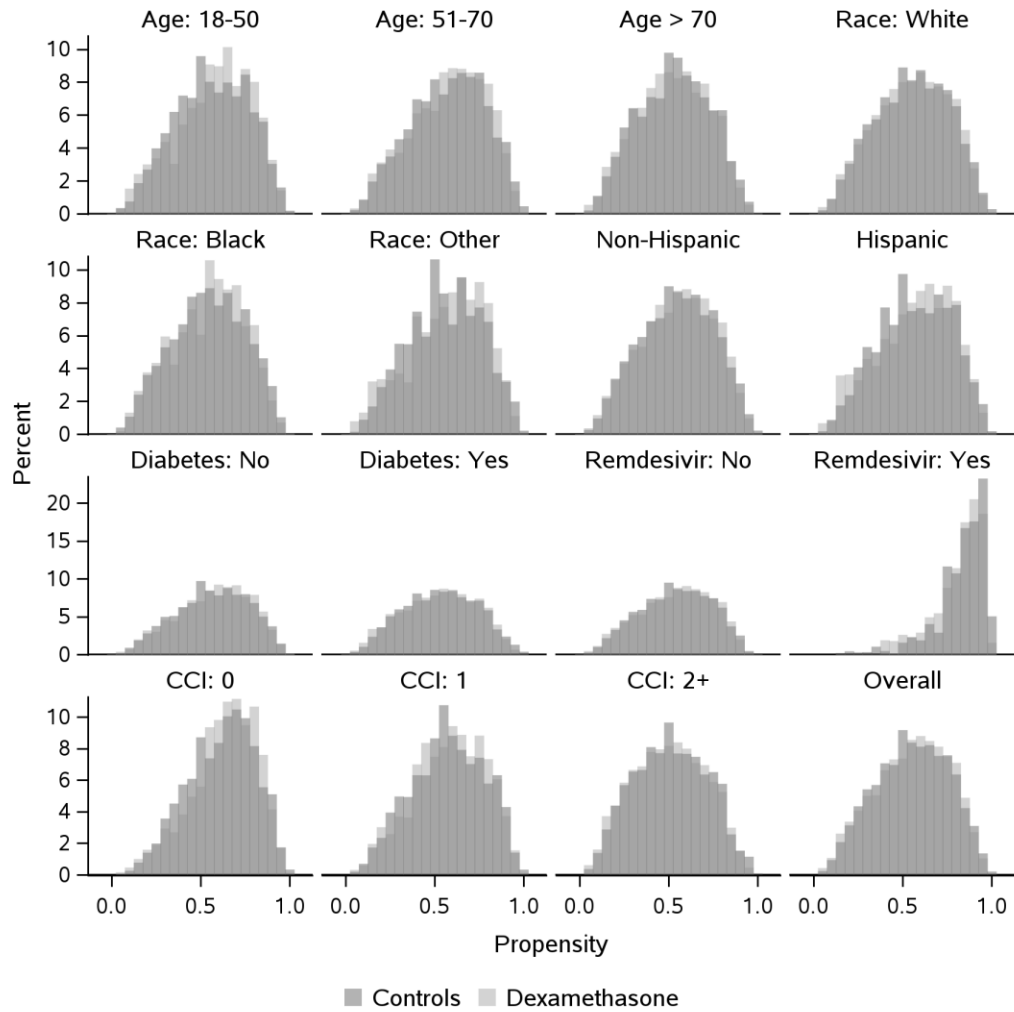



**eFigure 19.** Histogram of the Propensity Score Distribution Overlaid by Treatment After Overlap Weighting for NIPPV Cohort

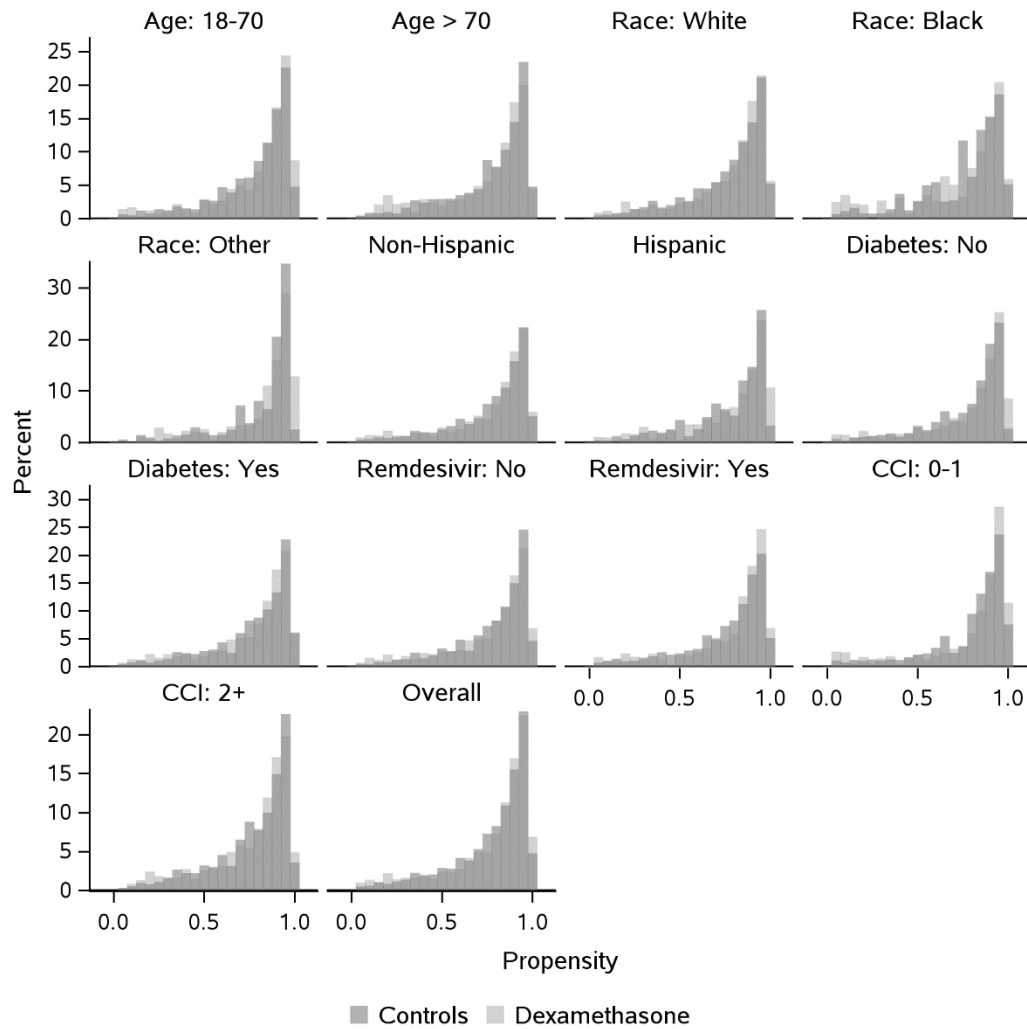



**eFigure 20.** Histogram of the Propensity Score Distribution Overlaid by Treatment After Overlap Weighting for MV or ECMO Cohort

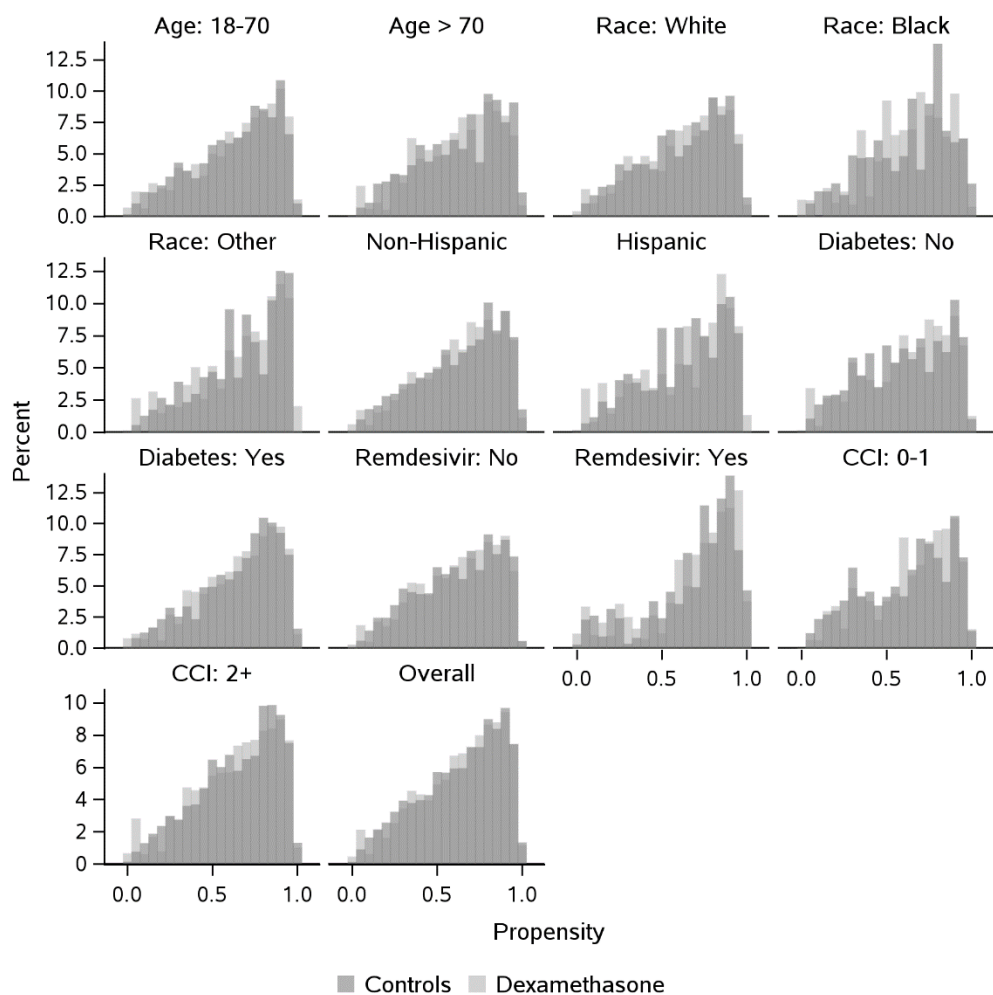

### eAppendix 3. Handling of Missing Data and Multiple Imputation

Missing data was not imputed for univariable descriptive tables and rates of missingness are reported in Supplement E. Community variables (bed size and ICU bed size) were imputed to the median value. Missing data for the covariates that vary over the course of hospitalization was imputed as follows: Missing at baseline (day 0) was imputed to the value measured at day 1 if available. This reflects the possibility that admissions late in the day may not have data added until the next day. The baseline value was not imputed with data beyond day 1. Intermittent missing data was imputed with the last value carried forward method to reflect the assumption that clinical decisions would be based on the last measured value and thus, accurately measure confounding.

Missing data for covariates was imputed as follows. Multiple imputation was done by fully conditional specification methods with 10 imputed datasets. Imputation was done using all main effects listed as well as including both in hospital mortality and mortality/hospice endpoints. The models also accounted for oxygenation level. For all missing variables we used 30 burn-in iterations. Missing binary variables were imputed using the logistic method with a logit link. Whereas categorical variables were imputed using the generalized logit function. Lastly, continuous variables were imputed using the predictive mean matching method. The analysis of outcomes after multiple imputation was conducted in SAS PROC MI and accounted for variability introduced by imputation.

The results based on a single imputed data set and multiply imputed data set were essentially identical. We, therefore, moved forward with the single imputed data set for simplicity. For example, here is a comparison of overall results with differences in bold:

**eTable 5.** Adjusted Odds Ratios of Single Imputed Data Set and Multiply Imputed Data Set

|                            | <b>Single imputed data set</b>     | <b>Multiply imputation analysis.</b> |
|----------------------------|------------------------------------|--------------------------------------|
| <b>No oxygen</b>           | aOR 0.90, 95% CI 0.78-1.03         | aOR 0.90, 95% CI 0.78-1.03           |
| <b>Supplemental oxygen</b> | aOR <b>0.92</b> , 95% CI 0.86-0.98 | aOR <b>0.91</b> , 95% CI 0.86-0.98   |
| <b>NIPPV</b>               | aOR 0.87, 95% CI <b>0.73</b> -1.04 | aOR 0.87, 95% CI <b>0.72</b> -1.04   |
| <b>MV/ECMO</b>             | aOR 0.82, 95% CI 0.68-0.99         | aOR 0.82, 95% CI 0.68-0.99           |

**eTable 6.** Frequency of End Points per Cohort

| <b>No supplemental oxygen</b> |              |                              |       |                             |       |                                   |       |                |
|-------------------------------|--------------|------------------------------|-------|-----------------------------|-------|-----------------------------------|-------|----------------|
| <b>End Point</b>              | <b>Level</b> | <b>Overall<br/>(N=13040)</b> |       | <b>Control<br/>(N=5503)</b> |       | <b>Dexamethasone<br/>(N=7537)</b> |       | <b>P-value</b> |
| Mortality                     | Yes          | 852                          | 6.53  | 438                         | 7.96  | 414                               | 5.49  | <.0001         |
|                               | No           | 12188                        | 93.47 | 5065                        | 92.04 | 7123                              | 94.51 |                |
| Mortality/Hospice             | Yes          | 1204                         | 9.23  | 661                         | 12.01 | 543                               | 7.20  | <.0001         |
|                               | No           | 11836                        | 90.77 | 4842                        | 87.99 | 6994                              | 92.80 |                |

  

| <b>Supplemental oxygen</b> |              |                              |       |                             |       |                                    |       |                |
|----------------------------|--------------|------------------------------|-------|-----------------------------|-------|------------------------------------|-------|----------------|
| <b>End Point</b>           | <b>Level</b> | <b>Overall<br/>(N=56368)</b> |       | <b>Control<br/>(N=7789)</b> |       | <b>Dexamethasone<br/>(N=48579)</b> |       | <b>P-value</b> |
| Mortality                  | Yes          | 8335                         | 14.79 | 1357                        | 17.42 | 6978                               | 14.36 | <.0001         |
|                            | No           | 48033                        | 85.21 | 6432                        | 82.58 | 41601                              | 85.64 |                |
| Mortality/Hospice          | Yes          | 9840                         | 17.46 | 1748                        | 22.44 | 8092                               | 16.66 | <.0001         |
|                            | No           | 46528                        | 82.54 | 6041                        | 77.56 | 40487                              | 83.34 |                |

  

| <b>Non-invasive positive pressure ventilation</b> |              |                             |       |                            |       |                                   |       |                |
|---------------------------------------------------|--------------|-----------------------------|-------|----------------------------|-------|-----------------------------------|-------|----------------|
| <b>End Point</b>                                  | <b>Level</b> | <b>Overall<br/>(N=7618)</b> |       | <b>Control<br/>(N=792)</b> |       | <b>Dexamethasone<br/>(N=6826)</b> |       | <b>P-value</b> |
| Mortality                                         | Yes          | 3574                        | 46.92 | 384                        | 48.48 | 3190                              | 46.73 | 0.3498         |
|                                                   | No           | 4044                        | 53.08 | 408                        | 51.52 | 3636                              | 53.27 |                |
| Mortality/Hospice                                 | Yes          | 3841                        | 50.42 | 421                        | 53.16 | 3420                              | 50.10 | 0.1037         |
|                                                   | No           | 3777                        | 49.58 | 371                        | 46.84 | 3406                              | 49.90 |                |

  

| <b>Mechanical ventilation or ECMO</b> |              |                             |       |                             |       |                                   |       |                |
|---------------------------------------|--------------|-----------------------------|-------|-----------------------------|-------|-----------------------------------|-------|----------------|
| <b>End Point</b>                      | <b>Level</b> | <b>Overall<br/>(N=3673)</b> |       | <b>Control<br/>(N=1013)</b> |       | <b>Dexamethasone<br/>(N=2660)</b> |       | <b>P-value</b> |
| Mortality                             | Yes          | 2068                        | 56.30 | 546                         | 53.90 | 1522                              | 57.22 | 0.0700         |
|                                       | No           | 1605                        | 43.70 | 467                         | 46.10 | 1138                              | 42.78 |                |
| Mortality/Hospice                     | Yes          | 2195                        | 59.76 | 586                         | 57.85 | 1609                              | 60.49 | 0.1447         |
|                                       | No           | 1478                        | 40.24 | 427                         | 42.15 | 1051                              | 39.51 |                |

**eTable 7.** Unadjusted Analysis of In-Hospital Mortality or Discharge to Hospice

|                   | No supplemental oxygen | Supplemental oxygen | NIPPV             | MV/ECMO           |
|-------------------|------------------------|---------------------|-------------------|-------------------|
| Variable          | OR (95% CI)            | OR (95% CI)         | OR (95% CI)       | OR (95% CI)       |
| <b>Age</b>        |                        |                     |                   |                   |
| 18-50             | 0.49 (0.30, 0.78)      | 0.81 (0.64, 1.02)   | 0.89 (0.73, 1.08) | 1.11 (0.93, 1.32) |
| 51-70             | 0.55 (0.44, 0.70)      | 0.81 (0.72, 0.90)   |                   |                   |
| > 70              | 0.65 (0.56, 0.76)      | 0.84 (0.77, 0.90)   | 1.03 (0.82, 1.31) | 1.20 (0.91, 1.58) |
| <b>Race</b>       |                        |                     |                   |                   |
| Black             | 0.67 (0.51, 0.88)      | 0.69 (0.60, 0.80)   | 0.99 (0.69, 1.43) | 1.04 (0.72, 1.48) |
| White             | 0.55 (0.47, 0.64)      | 0.65 (0.61, 0.70)   | 0.89 (0.74, 1.06) | 1.16 (0.96, 1.41) |
| Other             | 0.53 (0.39, 0.71)      | 0.83 (0.71, 0.96)   | 0.78 (0.54, 1.13) | 1.12 (0.83, 1.52) |
| <b>Ethnicity</b>  |                        |                     |                   |                   |
| Non-Hispanic      | 0.58 (0.50, 0.66)      | 0.67 (0.62, 0.71)   | 0.90 (0.76, 1.06) | 1.04 (0.88, 1.23) |
| Hispanic          | 0.56 (0.43, 0.74)      | 0.80 (0.70, 0.91)   | 0.80 (0.57, 1.12) | 1.38 (1.03, 1.85) |
| <b>Diabetes</b>   |                        |                     |                   |                   |
| No                | 0.46 (0.39, 0.55)      | 0.64 (0.59, 0.70)   | 0.84 (0.66, 1.05) | 1.23 (0.99, 1.52) |
| Yes               | 0.72 (0.61, 0.85)      | 0.77 (0.71, 0.84)   | 0.93 (0.77, 1.12) | 1.01 (0.82, 1.23) |
| <b>Remdesivir</b> |                        |                     |                   |                   |
| No                | 0.60 (0.53, 0.68)      | 0.70 (0.65, 0.75)   | 0.96 (0.79, 1.16) | 1.37 (1.16, 1.62) |
| Yes               | 0.91 (0.35, 2.37)      | 0.91 (0.78, 1.05)   | 0.78 (0.62, 0.99) | 0.55 (0.40, 0.76) |
| <b>CCI</b>        |                        |                     |                   |                   |
| 0                 | 0.74 (0.45, 1.20)      | 0.87 (0.70, 1.07)   | 0.88 (0.68, 1.13) | 1.14 (0.89, 1.46) |
| 1                 | 0.53 (0.40, 0.71)      | 0.82 (0.71, 0.95)   |                   |                   |
| 2+                | 0.71 (0.61, 0.81)      | 0.89 (0.83, 0.95)   | 0.95 (0.79, 1.14) | 1.09 (0.91, 1.31) |
| <b>O2 Flow</b>    |                        |                     |                   |                   |
| Low flow          |                        | 0.60 (0.57, 0.64)   |                   |                   |
| High flow         |                        | 0.88 (0.71, 1.08)   |                   |                   |
| <b>Overall</b>    | 0.57 (0.50, 0.64)      | 0.69 (0.65, 0.73)   | 0.88 (0.76, 1.03) | 1.12 (0.96, 1.29) |

**eFigure 21.** Time Epoch Sensitivity Analysis for Oatients on No Supplemental Oxygen

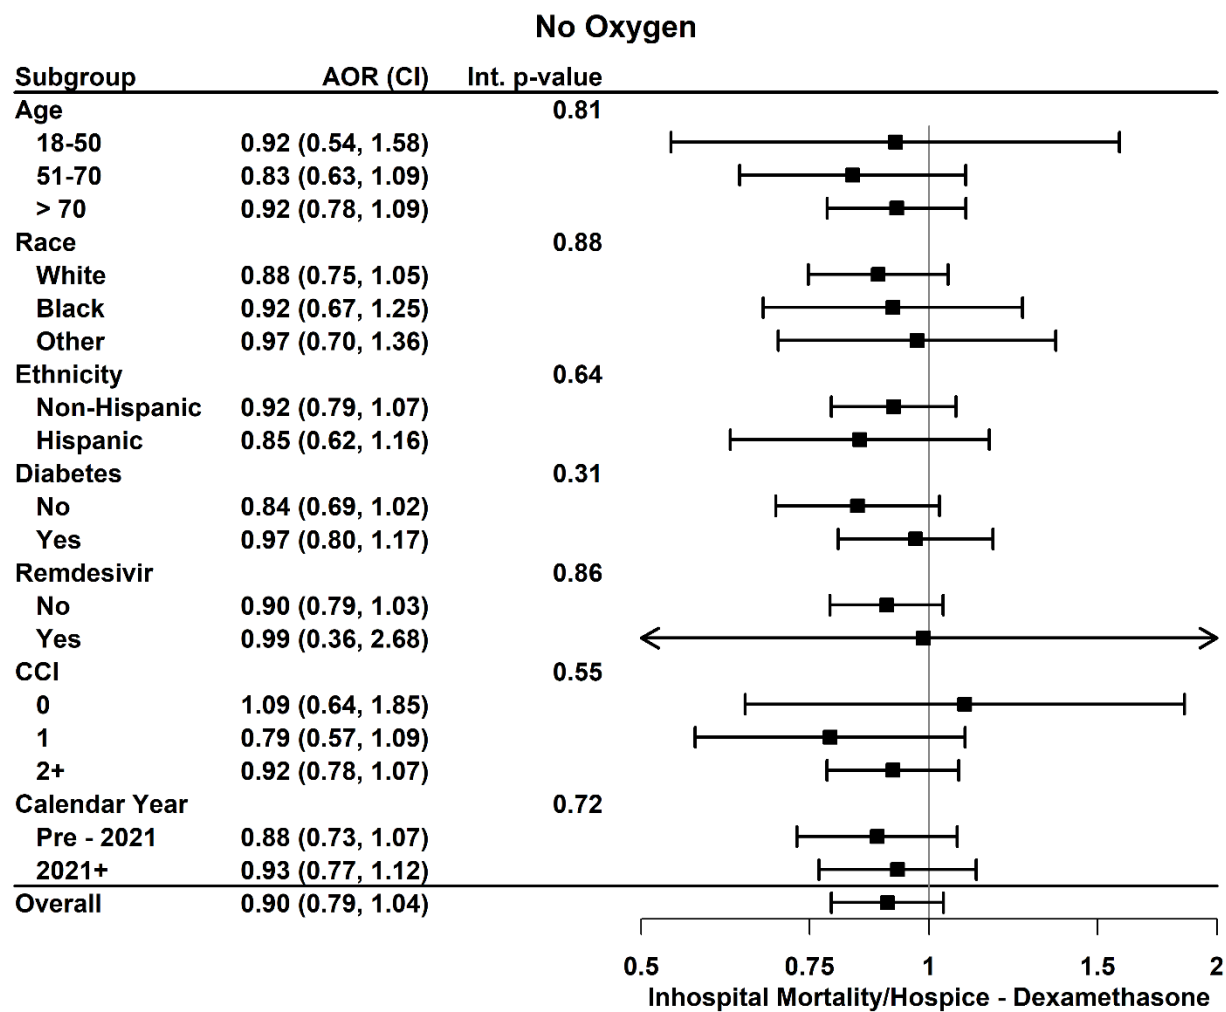

**eFigure 22.** Time Epoch Sensitivity Analysis for Patients on Supplemental Oxygen

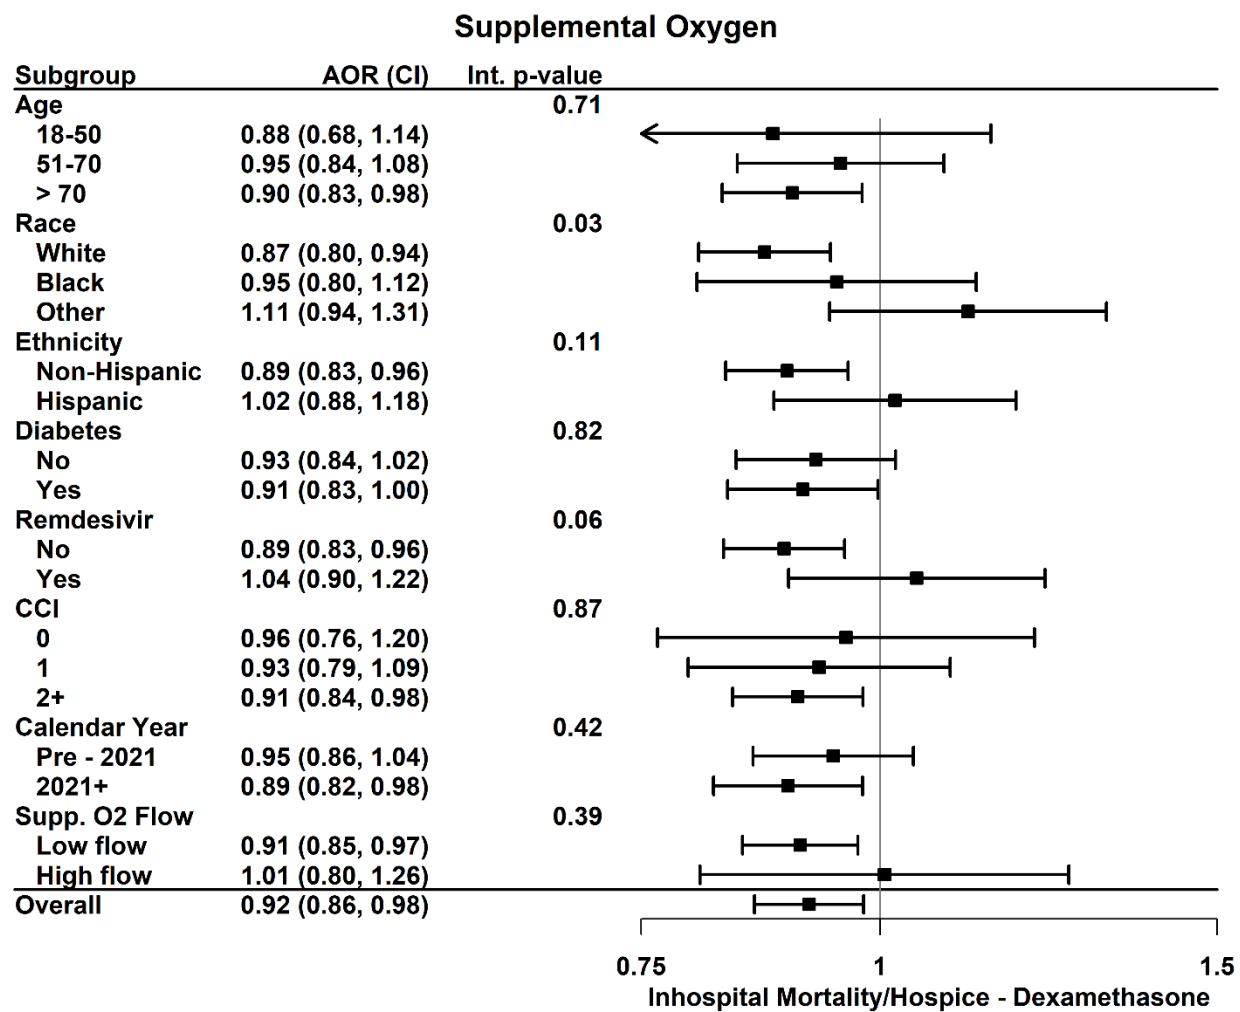

**eFigure 23.** Time Epoch Sensitivity Analysis for Patients on NIPPV

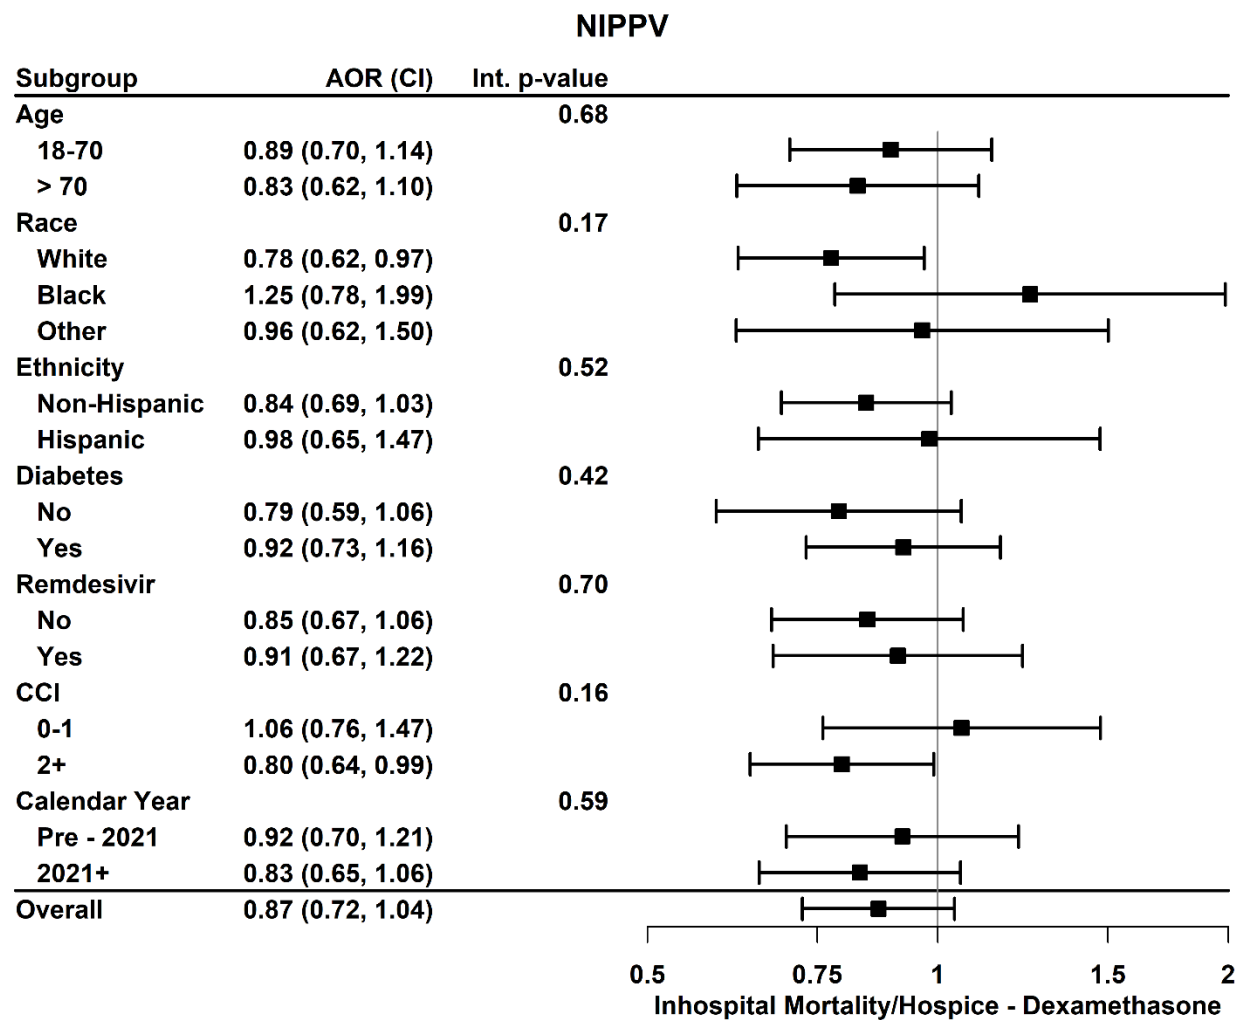

**eFigure 24.** Time Epoch Sensitivity Analysis for Patients on MV/ECMO

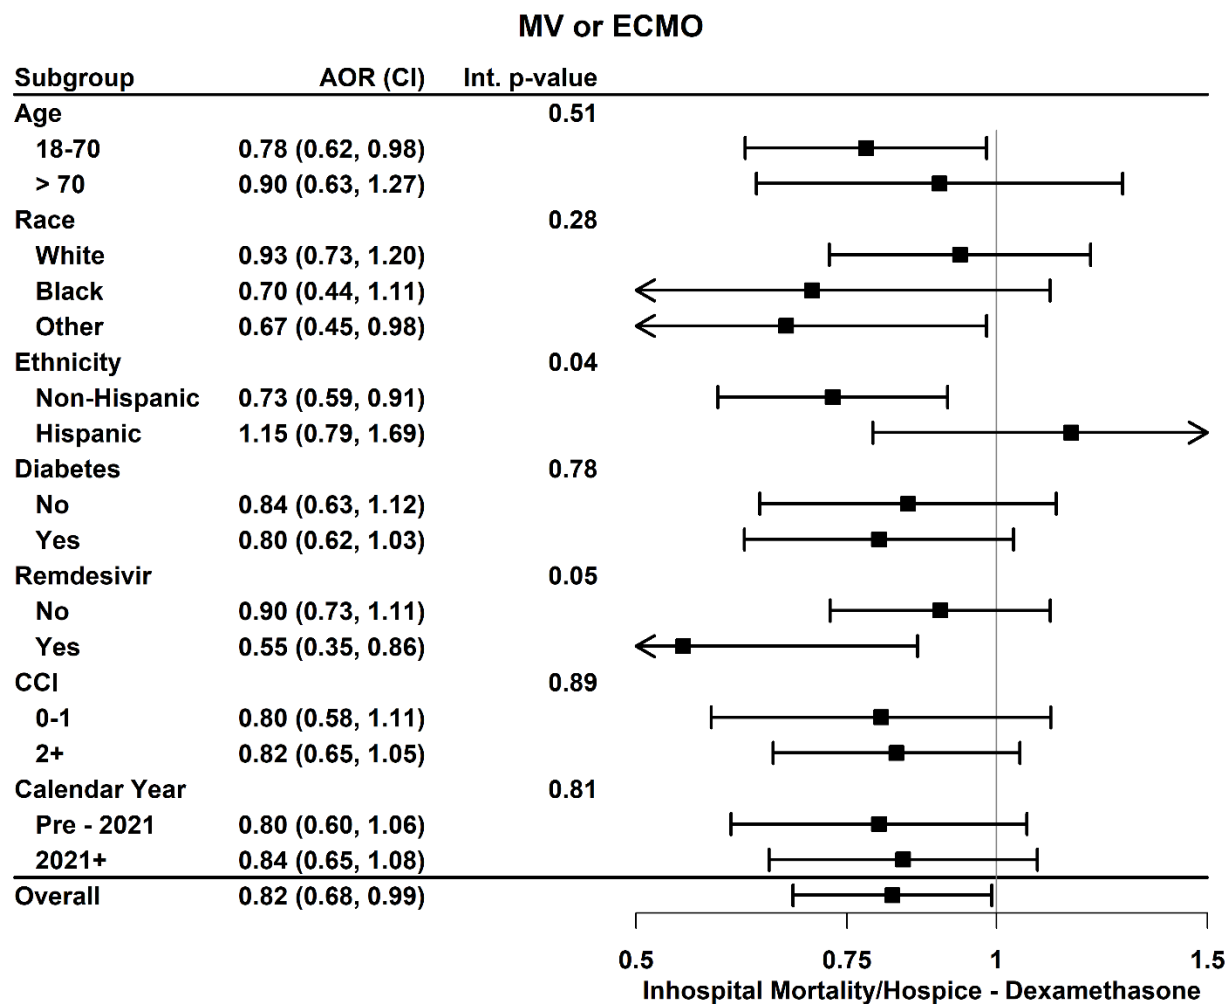

Supplement: jamanetwopen-e238516-s001.pdf [file jamanetwopen-e238516-s001.pdf]
