# Supplementary material for: Dexamethasone for Inpatients With COVID-19 in a National Cohort
Source: PubMed Central journal article supplement (PMC10111178; doi:10.1001/jamanetworkopen.2023.8516), 2023-04-17
Supplement: jamanetwopen-e238516-s002.pdf [file jamanetwopen-e238516-s002.pdf]

## Data Sharing Statement

Mourad. Dexamethasone for Inpatients With COVID-19 in a National Cohort. *JAMA Netw Open*. Published April 17, 2023. doi:10.1001/jamanetworkopen.2023.8516

### Data

**Data available:** No
